# Supplementary material for: Protomers of DNA-binding dye fluoresce different colours: intrinsic photophysics of Hoechst 33258
Source: Royal Society of Chemistry journal article supplement (doi:10.1039/c9cp02421b), 2019-01-01
Supplement: c9cp02421b2.pdf [file c9cp02421b2.pdf]

Supplementary Information: Coordinates for DFT and TD-DFT

**Protomers of DNA-binding dye fluoresce different colours: intrinsic photophysics of Hoechst 33258**

JoAnn C. Chen, and Rebecca A. Jockusch\*

Department of Chemistry, University of Toronto

80 St. George Street, Toronto, ON Canada L5B 4M7

\*Corresponding Author: email: [rebecca.jockusch@utoronto.ca](mailto:rebecca.jockusch@utoronto.ca)

*Submitted to Physical Chemistry Chemical Physics, April 2019*

Contents

|                                                                      |    |
|----------------------------------------------------------------------|----|
| Ground State ( $S_0$ ) of 1+ Charge State at B3LYP/6-31G(d).....     | 2  |
| Ground State ( $S_0$ ) of 1+ Charge State at B3LYP/6-311+G(d,p)..... | 36 |
| Ground State ( $S_0$ ) of 2+ Charge State at B3LYP/6-31G(d).....     | 44 |
| Excited State ( $S_1$ ) of 1+ Charge State at B3LYP/6-31G(d).....    | 76 |

## Ground State (S<sub>0</sub>) of 1+ Charge State at B3LYP/6-31G(d)

### H-pipN2-I

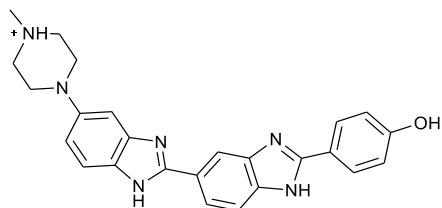

C, 0, 7.192098, 3.450178, 1.750351  
N, 0, 7.250836, 2.43377, 0.648021  
C, 0, 7.303182, 1.00816, 1.174703  
C, 0, 7.408737, 0.028319, -0.003801  
N, 0, 6.31335, 0.176318, -0.947017  
C, 0, 6.232252, 1.530372, -1.45202  
C, 0, 6.113888, 2.598458, -0.349038  
C, 0, 5.103381, -0.559546, -0.687881  
C, 0, 3.858992, 0.064659, -0.57018  
C, 0, 2.725383, -0.732486, -0.361873  
C, 0, 2.85735, -2.13726, -0.246121  
C, 0, 4.09272, -2.771428, -0.361204  
C, 0, 5.205628, -1.968406, -0.596188  
N, 0, 1.569364, -2.583006, -0.026028  
C, 0, 0.736959, -1.474963, -0.028284  
N, 0, 1.411342, -0.352028, -0.219916  
C, 0, -0.711811, -1.563269, 0.155123  
C, 0, -1.486816, -0.429789, -0.128325  
C, 0, -2.869008, -0.511628, 0.033457  
C, 0, -3.459121, -1.723943, 0.478642  
C, 0, -2.702147, -2.85823, 0.773549  
C, 0, -1.325691, -2.758623, 0.606049  
N, 0, -3.840812, 0.445691, -0.182733  
C, 0, -4.985961, -0.137375, 0.112539  
N, 0, -4.808399, -1.453452, 0.522808  
C, 0, -6.296755, 0.503778, 0.024036  
C, 0, -6.379684, 1.808492, -0.49997  
C, 0, -7.59745, 2.459605, -0.607718  
C, 0, -8.772992, 1.818227, -0.190782  
C, 0, -8.708998, 0.522545, 0.335485  
C, 0, -7.480712, -0.12305, 0.440295  
O, 0, -9.938819, 2.506331, -0.321919  
H, 0, 7.197367, 4.449496, 1.311498  
H, 0, 6.271928, 3.29445, 2.315239  
H, 0, 8.058236, 3.317547, 2.401035  
H, 0, 8.125208, 2.588769, 0.13006  
H, 0, 6.378699, 0.851971, 1.737161  
H, 0, 8.15991, 0.947259, 1.851996  
H, 0, 7.425053, -0.984335, 0.401384  
H, 0, 8.366768, 0.184226, -0.523621  
H, 0, 5.378857, 1.627976, -2.1268019  
H, 0, 7.134957, 1.741162, -2.04716  
H, 0, 5.192987, 2.495848, 0.228178

H,0,6.181779,3.614737,-0.747872  
H,0,3.722208,1.137395,-0.652078  
H,0,4.196874,-3.850622,-0.300321  
H,0,6.171,-2.439866,-0.753936  
H,0,1.270251,-3.545951,0.008546  
H,0,-1.013762,0.482947,-0.471078  
H,0,-3.155412,-3.779905,1.125852  
H,0,-0.717222,-3.62221,0.860236  
H,0,-5.537206,-2.107808,0.763748  
H,0,-5.464937,2.295037,-0.820399  
H,0,-7.664968,3.463985,-1.012836  
H,0,-9.616651,0.021556,0.665271  
H,0,-7.465319,-1.124,0.864269  
H,0,-10.676362,1.961853,-0.004023

## H-pip1-b

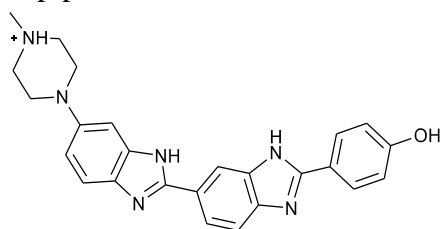

C,0,9.511816,0.476646,1.748258  
N,0,8.554214,0.988393,0.71219  
C,0,8.27456,-0.039629,-0.373347  
C,0,7.294281,0.54775,-1.405584  
N,0,6.076466,1.068317,-0.824093  
C,0,6.351862,2.05054,0.209111  
C,0,7.256013,1.495074,1.320425  
C,0,4.928673,0.215537,-0.66257  
C,0,3.671476,0.830868,-0.566129  
C,0,2.564564,0.002969,-0.406289  
C,0,2.663114,-1.413967,-0.367863  
C,0,3.917725,-2.011642,-0.498411  
C,0,5.038202,-1.192473,-0.630321  
N,0,1.41806,-1.983487,-0.218831  
C,0,0.567808,-0.975349,-0.171987  
N,0,1.214893,0.252422,-0.288854  
C,0,-0.878816,-1.100407,-0.013267  
C,0,-1.740553,-0.011582,-0.231251  
C,0,-3.10052,-0.231251,-0.050283  
C,0,-3.628606,-1.491267,0.337212  
C,0,-2.756832,-2.569755,0.546169  
C,0,-1.398511,-2.364019,0.367427  
N,0,-4.2116,0.580572,-0.177496  
C,0,-5.325812,-0.188008,0.122328  
N,0,-4.999049,-1.42962,0.436456  
C,0,-6.692135,0.327853,0.090154  
C,0,-7.757834,-0.561036,0.33323  
C,0,-9.071928,-0.124263,0.311814  
C,0,-9.357169,1.222811,0.04505  
C,0,-8.310462,2.121089,-0.196035  
C,0,-6.993437,1.672901,-0.171782  
O,0,-10.665594,1.593118,0.036029  
H,0,10.434537,0.165804,1.255092  
H,0,9.715752,1.273091,2.466055  
H,0,9.052322,-0.373942,2.253642  
H,0,8.997905,1.793462,0.251625  
H,0,7.861902,-0.910396,0.139954  
H,0,9.237252,-0.30337,-0.820857  
H,0,7.058094,-0.223172,-2.142364  
H,0,7.806595,1.359183,-1.947653  
H,0,5.420587,2.384791,0.668516  
H,0,6.829557,2.936914,-0.237671  
H,0,6.792108,0.639103,1.817946  
H,0,7.523407,2.251458,2.06398  
H,0,3.573983,1.909051,-0.65558

H, 0, 4.013252, -3.092556, -0.48785  
H, 0, 6.008243, -1.669658, -0.726812  
H, 0, 0.779183, 1.158672, -0.210969  
H, 0, -1.371728, 0.956452, -0.561054  
H, 0, -3.14776, -3.538706, 0.839075  
H, 0, -0.694055, -3.174187, 0.517473  
H, 0, -4.215862, 1.540834, -0.484934  
H, 0, -7.526402, -1.600618, 0.537599  
H, 0, -9.894812, -0.806802, 0.497177  
H, 0, -8.525605, 3.168044, -0.399241  
H, 0, -6.204058, 2.398325, -0.353108  
H, 0, -10.735389, 2.540759, -0.160221

## H-pipN2-II

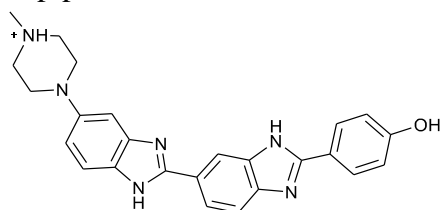

C,0,8.268832,2.270249,1.955394  
N,0,8.073627,1.189449,0.932857  
C,0,7.546382,-0.099553,1.543704  
C,0,7.416014,-1.17113,0.450354  
N,0,6.560384,-0.745151,-0.643896  
C,0,7.031271,0.490369,-1.232546  
C,0,7.189915,1.639868,-0.22047  
C,0,5.145853,-0.981097,-0.519764  
C,0,4.205428,0.04871,-0.603693  
C,0,2.84491,-0.276107,-0.516194  
C,0,2.447873,-1.620639,-0.318317  
C,0,3.376116,-2.656224,-0.23251  
C,0,4.722587,-2.32092,-0.349087  
N,0,1.069816,-1.562979,-0.256952  
C,0,0.697552,-0.237856,-0.424918  
N,0,1.74959,0.553032,-0.574349  
C,0,-0.693548,0.207532,-0.432805  
C,0,-1.741456,-0.644651,-0.043393  
C,0,-3.031138,-0.130855,-0.0941  
C,0,-3.311942,1.197095,-0.512157  
C,0,-2.255572,2.038417,-0.890307  
C,0,-0.964863,1.53677,-0.846585  
N,0,-4.269695,-0.662149,0.210506  
C,0,-5.21628,0.321196,-0.03123  
N,0,-4.664043,1.442439,-0.462534  
C,0,-6.649816,0.126334,0.170162  
C,0,-7.528669,1.178628,-0.154415  
C,0,-8.896608,1.04563,0.015737  
C,0,-9.425867,-0.151908,0.518818  
C,0,-8.567235,-1.207819,0.848425  
C,0,-7.194352,-1.064523,0.674301  
O,0,-10.775779,-0.224502,0.663604  
H,0,8.684474,3.151828,1.464172  
H,0,7.299472,2.50901,2.395166  
H,0,8.951461,1.909196,2.726655  
H,0,8.995383,0.970982,0.533439  
H,0,6.57321,0.140719,1.980362  
H,0,8.243163,-0.388127,2.335932  
H,0,7.017468,-2.07574,0.911769  
H,0,8.415985,-1.419589,0.062053  
H,0,6.349753,0.811912,-2.02332  
H,0,8.007768,0.306826,-1.708332  
H,0,6.237936,1.929859,0.228348  
H,0,7.665409,2.519318,-0.664313  
H,0,4.475241,1.088468,-0.753093

H,0,3.0769,-3.69261,-0.107599  
H,0,5.464735,-3.113584,-0.349874  
H,0,0.443239,-2.35276,-0.221577  
H,0,-1.558737,-1.655831,0.311103  
H,0,-2.456244,3.055713,-1.210346  
H,0,-0.12329,2.156203,-1.134877  
H,0,-4.453783,-1.602714,0.523808  
H,0,-7.109263,2.100091,-0.543053  
H,0,-9.576013,1.853898,-0.234191  
H,0,-8.971866,-2.138081,1.241488  
H,0,-6.555884,-1.901645,0.945849  
H,0,-11.020361,-1.094914,1.015796

## H-pip1-d

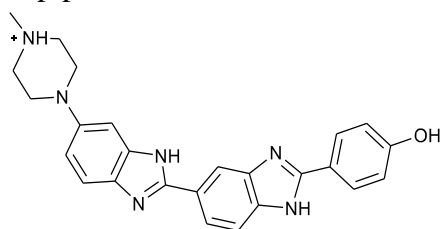

C, 0, 9.2196668381, -1.9258303698, 1.6333582066  
N, 0, 8.5861695556, -0.8050703266, 0.8622558063  
C, 0, 8.06718957, -1.258333856, -0.4936852511  
C, 0, 7.4392139391, -0.063667717, -1.2353229025  
N, 0, 6.4274897054, 0.6316802714, -0.4708167997  
C, 0, 6.9308906281, 1.0625949987, 0.8208848556  
C, 0, 7.4913368768, -0.1032827242, 1.6501973165  
C, 0, 5.0475307293, 0.2337525619, -0.5640703932  
C, 0, 4.0740519809, 1.1854609182, -0.2259246686  
C, 0, 2.741121012, 0.7957574785, -0.3132908484  
C, 0, 2.3444245775, -0.4957061759, -0.7531142187  
C, 0, 3.3247366506, -1.420224858, -1.1169429429  
C, 0, 4.6650978944, -1.0524302841, -1.0057289637  
N, 0, 0.9711839107, -0.6047678346, -0.7620092475  
C, 0, 0.5185926061, 0.5646512389, -0.3528272296  
N, 0, 1.5541582488, 1.4518825768, -0.0732792768  
C, 0, -0.893176874, 0.9143240529, -0.1950211144  
C, 0, -1.8407851488, -0.117808184, -0.2492220419  
C, 0, -3.1873886524, 0.2076747711, -0.0951443867  
C, 0, -3.570741497, 1.5595984841, 0.109740677  
C, 0, -2.6417953809, 2.5993238085, 0.1581531604  
C, 0, -1.3033675547, 2.2564887988, 0.0027257336  
N, 0, -4.299306487, -0.6114064904, -0.1046078225  
C, 0, -5.3311158112, 0.187356304, 0.0826748837  
N, 0, -4.9421911339, 1.5147390456, 0.2225135444  
C, 0, -6.7251876537, -0.248992134, 0.1391412304  
C, 0, -7.0220226894, -1.6036081685, -0.1074259894  
C, 0, -8.3263106508, -2.0681635917, -0.0682640288  
C, 0, -9.3755741753, -1.183608625, 0.2209034594  
C, 0, -9.0987026392, 0.1656064629, 0.471392294  
C, 0, -7.7849455121, 0.6226998958, 0.430408814  
O, 0, -10.6351852028, -1.6964803545, 0.2444239439  
H, 0, 10.0198108197, -2.3614974849, 1.032339285  
H, 0, 9.62062938, -1.530221489, 2.5681800887  
H, 0, 8.4564112545, -2.6768719923, 1.8417763036  
H, 0, 9.3151957709, -0.1029568233, 0.6814821477  
H, 0, 7.3393105447, -2.0452486005, -0.2863938843  
H, 0, 8.9168777429, -1.6821629768, -1.0368495244  
H, 0, 7.0178231624, -0.4191725793, -2.1781906227  
H, 0, 8.2427703267, 0.6452598471, -1.4933612442  
H, 0, 6.1334396167, 1.5332607244, 1.3975756184  
H, 0, 7.7193045509, 1.8190162907, 0.6800959788  
H, 0, 6.7218898054, -0.8543604739, 1.8482802903  
H, 0, 7.9354994984, 0.225570652, 2.5941648179  
H, 0, 4.3597250064, 2.1959721488, 0.0520031367



H, 0, 3.0429561887, -2.4068615654, -1.4702006848  
H, 0, 5.4176863138, -1.7820407739, -1.2875643705  
H, 0, 1.4498300885, 2.3801397054, 0.3072140955  
H, 0, -1.5236719818, -1.1420795014, -0.406701903  
H, 0, -2.9393436667, 3.6338537933, 0.3008313838  
H, 0, -0.5690523811, 3.0575734752, 0.0052559277  
H, 0, -5.554488394, 2.3077877124, 0.3386178967  
H, 0, -6.2034623401, -2.2790082111, -0.3309489911  
H, 0, -8.5583859229, -3.1107713883, -0.2594258103  
H, 0, -9.9078715766, 0.855732114, 0.7007809124  
H, 0, -7.6039328502, 1.6738981535, 0.64058793  
H, 0, -11.2697446177, -0.9925227303, 0.4523034231

## H-pipN5-I

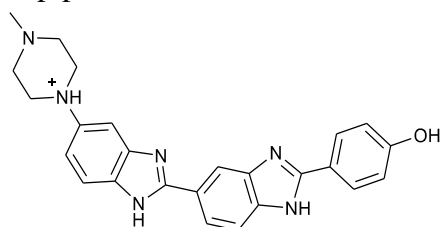

C, 0, -9.987265761, -2.2010405658, -0.0643661335  
N, 0, -8.7746713265, -1.3836754618, -0.0149802247  
C, 0, -7.931998083, -1.7050079751, 1.1272269418  
C, 0, -6.7947474735, -0.6970887539, 1.2519011987  
N, 0, -5.9752974693, -0.6789344247, -0.0294535818  
C, 0, -6.8754105094, -0.4280617667, -1.2296952371  
C, 0, -8.0089881975, -1.4472746618, -1.2510276819  
C, 0, -4.784595233, 0.2112097801, 0.0279693554  
C, 0, -3.5359491719, -0.3918420592, -0.079119571  
C, 0, -2.4167506175, 0.444704016, -0.0256199028  
C, 0, -2.5969984981, 1.8484087307, 0.1293100302  
C, 0, -3.8548954537, 2.4367577429, 0.2356317951  
C, 0, -4.9663107958, 1.5945265137, 0.1836420854  
N, 0, -1.3169565314, 2.3491721676, 0.1364611369  
C, 0, -0.4401669711, 1.280095439, -0.0028036913  
N, 0, -1.0870566883, 0.1279697269, -0.1038392677  
C, 0, 1.0104555601, 1.4313336608, -0.0272381838  
C, 0, 1.7953458026, 0.2677995572, 0.003332587  
C, 0, 3.1814346662, 0.402321, -0.012934242  
C, 0, 3.7667709893, 1.6962963021, -0.0629016347  
C, 0, 3.0007605978, 2.8625779977, -0.1003351043  
C, 0, 1.6199515735, 2.7106361731, -0.0815624783  
N, 0, 4.1614815204, -0.5687018173, 0.0143984614  
C, 0, 5.3079920185, 0.0817609922, -0.0178808678  
N, 0, 5.1207430445, 1.4599286487, -0.0662665905  
C, 0, 6.6263607322, -0.547170361, -0.0042895512  
C, 0, 6.7065088842, -1.9505722945, 0.0892224125  
C, 0, 7.9312293803, -2.5964450536, 0.1067112392  
C, 0, 9.1168210561, -1.8504161395, 0.030167966  
C, 0, 9.055816204, -0.4545610887, -0.0647051764  
C, 0, 7.8206873082, 0.1851972765, -0.0816421771  
O, 0, 10.2878102533, -2.5391848267, 0.0521571605  
H, 0, -10.6122766081, -1.8716394366, -0.8993007188  
H, 0, -10.5553630423, -2.0624322879, 0.8599287287  
H, 0, -9.7771199028, -3.2778963993, -0.1879478714  
H, 0, -8.5268024571, -1.6526628306, 2.0449538352  
H, 0, -7.5153163174, -2.7334002032, 1.0740033882  
H, 0, -6.1053920092, -0.9414566351, 2.0627115277  
H, 0, -7.1780345717, 0.3143754063, 1.3912333227  
H, 0, -5.6079302661, -1.6310694599, -0.1446310317  
H, 0, -6.2411606493, -0.4882566305, -2.1165064935  
H, 0, -7.2598815192, 0.5870474726, -1.124273934  
H, 0, -8.6610027003, -1.2041265679, -2.0963194557  
H, 0, -7.5967213612, -2.4602721862, -1.445796788  
H, 0, -3.4088259613, -1.4652476623, -0.1989536991

H, 0, -3.9845216733, 3.5076287672, 0.3545542384  
H, 0, -5.9597446415, 2.0233509325, 0.2638457183  
H, 0, -1.0563574764, 3.3138682294, 0.2783407041  
H, 0, 1.3264367459, -0.708326251, 0.0421519577  
H, 0, 3.451992328, 3.8488598397, -0.1480358015  
H, 0, 1.0105486416, 3.6087412513, -0.1331690183  
H, 0, 5.845639252, 2.1613401773, -0.0842324154  
H, 0, 5.7843835466, -2.5183151103, 0.1478642543  
H, 0, 7.9969296875, -3.6770510342, 0.1792934255  
H, 0, 9.9716363223, 0.1291947756, -0.1266365597  
H, 0, 7.8100915702, 1.2693749084, -0.1613566644  
H, 0, 11.0333107209, -1.9207690207, -0.0066084866

## H-pip2-b

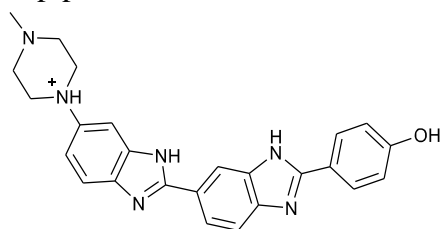

C, 0, -5.6407661648, -3.990557953, 0.295938778  
N, 0, -5.8803522048, -2.5641537154, 0.0834981584  
C, 0, -6.864369846, -2.271570106, -0.9492807489  
C, 0, -6.6860354817, -0.820905107, -1.4057976382  
N, 0, -6.4675361455, 0.1245266992, -0.2044296191  
C, 0, -6.909700749, -0.5460103065, 1.0906890064  
C, 0, -6.1706387792, -1.8631655973, 1.3390756517  
C, 0, -5.1291328236, 0.7817786743, -0.1283028397  
C, 0, -3.9622883145, 0.0189224924, -0.2100542955  
C, 0, -2.7755870825, 0.7385324174, -0.108076763  
C, 0, -2.7380400708, 2.1519451462, 0.0729826637  
C, 0, -3.9346038438, 2.8730852415, 0.1538404956  
C, 0, -5.1334970168, 2.174247556, 0.0504673884  
N, 0, -1.4437925891, 2.5955893088, 0.1369609569  
C, 0, -0.6843688688, 1.5191264703, 0.0036940869  
N, 0, -1.4513932748, 0.3667917685, -0.1421415651  
C, 0, 0.7721739869, 1.518017807, 0.0039933248  
C, 0, 1.5126431331, 0.321026231, 0.0082821984  
C, 0, 2.8959215484, 0.4309573286, 0.0028482836  
C, 0, 3.5655662423, 1.6854531864, -0.005286972  
C, 0, 2.8143157141, 2.8699690538, -0.0049119639  
C, 0, 1.4329873346, 2.77404827, 0.0007636439  
N, 0, 3.9167502395, -0.5000372378, 0.0094640178  
C, 0, 5.1158574541, 0.1953680283, 0.0028039143  
N, 0, 4.926320385, 1.5049181368, -0.006193262  
C, 0, 6.4237639804, -0.4520700272, 0.0051457914  
C, 0, 7.5784835454, 0.3558179965, -0.0062150766  
C, 0, 8.8435284639, -0.2067341078, -0.0045095022  
C, 0, 8.9887323088, -1.6020518945, 0.0087951585  
C, 0, 7.8519047807, -2.4205638817, 0.0203574001  
C, 0, 6.5852936932, -1.8461654103, 0.0185308219  
O, 0, 10.2540595276, -2.0956595447, 0.0098208317  
H, 0, -4.8412820193, -4.1152775767, 1.0328886284  
H, 0, -5.315642098, -4.4521461505, -0.6409014946  
H, 0, -6.5331554416, -4.5260427812, 0.6629561186  
H, 0, -6.6738782948, -2.9111671045, -1.8166154786  
H, 0, -7.9066672065, -2.4690596445, -0.6377121299  
H, 0, -7.5627832354, -0.4565292874, -1.947262977  
H, 0, -5.8048643921, -0.7093422989, -2.0350526679  
H, 0, -7.118576465, 0.9022516355, -0.3359509567  
H, 0, -7.985555426, -0.7079222132, 0.9838102498  
H, 0, -6.7405537874, 0.1712847864, 1.8951434674  
H, 0, -5.2299021793, -1.6820070168, 1.8695959962  
H, 0, -6.815112116, -2.4575897628, 2.0108584375  
H, 0, -4.0033809469, -1.0579044756, -0.3412914052

H, 0, -3.9202861661, 3.9494445686, 0.2850274371  
H, 0, -6.0751793678, 2.7181742023, 0.1036659659  
H, 0, -1.0965958489, -0.5607032397, -0.3198530105  
H, 0, 1.0340874882, -0.6547681261, 0.0370756558  
H, 0, 3.3138630416, 3.8330523218, -0.0089009171  
H, 0, 0.8195448055, 3.667605745, 0.0008377777  
H, 0, 3.8102390466, -1.5026796513, 0.0177890654  
H, 0, 7.4553764372, 1.433166573, -0.0162496651  
H, 0, 9.7347044285, 0.4120702151, -0.0131966754  
H, 0, 7.9589842861, -3.5030752618, 0.0309820198  
H, 0, 5.7244601521, -2.5103625114, 0.0282616053  
H, 0, 10.2287562228, -3.065649869, 0.0200426269

## H-pipN5-II

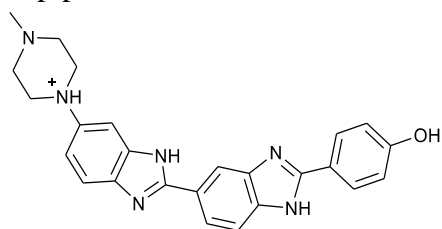

C,0,-10.1567928325,-1.0078971058,-0.1869186979  
N,0,-8.713031591,-0.775358127,-0.1323516669  
C,0,-8.2252768278,-0.0273149843,-1.2815694334  
C,0,-6.7011577707,0.010800356,-1.2856943001  
N,0,-6.1930783166,0.6283470347,0.0087599286  
C,0,-6.776917639,-0.1039069582,1.2079618654  
C,0,-8.2978495715,-0.1370840378,1.10797761  
C,0,-4.7173658917,0.794384537,0.061245441  
C,0,-3.8973933796,-0.3364803762,0.0349559395  
C,0,-2.5302720092,-0.0854972173,0.087274575  
C,0,-1.9905298027,1.2326865254,0.1618261168  
C,0,-2.8508505263,2.3354011548,0.1880912879  
C,0,-4.2227330998,2.104553225,0.1365324071  
N,0,-0.6218845678,1.1898291894,0.1995516476  
C,0,-0.2979998667,-0.0921727829,0.1511146952  
N,0,-1.4263231844,-0.9044344159,0.0866452563  
C,0,1.0635965063,-0.6146549402,0.1582586337  
C,0,2.1207150508,0.3029785964,0.0499268366  
C,0,3.4248274666,-0.1855985203,0.0497290385  
C,0,3.6579702499,-1.5832896244,0.1594794992  
C,0,2.6185249756,-2.5078891501,0.2747230577  
C,0,1.3237824364,-2.0040422713,0.2723810992  
N,0,4.620715056,0.4957041353,-0.0468182574  
C,0,5.5612046177,-0.4269591425,0.0010969209  
N,0,5.0263575631,-1.7061738526,0.124491544  
C,0,6.9960811072,-0.1618070355,-0.0649260467  
C,0,7.4347252684,1.1747277565,-0.143311915  
C,0,8.7836018781,1.4810040525,-0.2069372914  
C,0,9.7362558215,0.4512725384,-0.1940310282  
C,0,9.3179434844,-0.8830704629,-0.1180092676  
C,0,7.9605727792,-1.1808110828,-0.0546657269  
O,0,11.0443123586,0.8130227409,-0.258214115  
H,0,-10.4558729547,-1.6291079178,0.6621290415  
H,0,-10.4020854937,-1.5481736711,-1.1057063148  
H,0,-10.7454784884,-0.0742258918,-0.1620933106  
H,0,-8.5497281126,-0.5220384993,-2.2028581355  
H,0,-8.6247236372,1.008618964,-1.3170119464  
H,0,-6.2988293687,0.6150527981,-2.1013546416  
H,0,-6.2823547361,-0.9950327916,-1.3358409195  
H,0,-6.582570303,1.5780500049,0.0406557353  
H,0,-6.4263741506,0.4218434609,2.0984646226  
H,0,-6.3591882738,-1.1112932547,1.1909594132  
H,0,-8.6762562594,-0.7131314626,1.9587204881  
H,0,-8.7014505563,0.892424066,1.2138368524  
H,0,-4.2957910208,-1.3447161493,-0.0218952352

H, 0, -2.4518513549, 3.3420619179, 0.2461266469  
H, 0, -4.9099804256, 2.9482985933, 0.1547291769  
H, 0, -1.4252787036, -1.9087308387, -0.0111559735  
H, 0, 1.9180277641, 1.3642090425, -0.0337067009  
H, 0, 2.8015566719, -3.5738992366, 0.3687240684  
H, 0, 0.505130906, -2.7097837231, 0.38520956  
H, 0, 5.5472350244, -2.5671565413, 0.1962532952  
H, 0, 6.6905938852, 1.963574095, -0.1523165289  
H, 0, 9.1252284524, 2.5091112798, -0.2665546781  
H, 0, 10.0519424902, -1.6858970469, -0.1099937969  
H, 0, 7.6708461284, -2.2273625604, -0.0020068785  
H, 0, 11.6049227742, 0.0211356086, -0.2416894938

## H-pip2-d

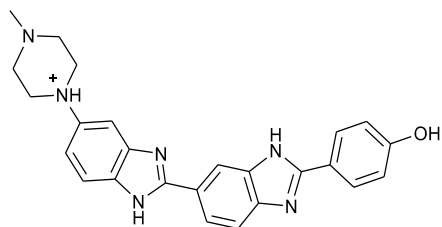

C, 0, -8.946819, 2.39842, -0.280447  
N, 0, -8.053242, 1.252725, -0.123252  
C, 0, -8.561828, 0.209106, 0.754149  
C, 0, -7.389569, -0.660276, 1.216876  
N, 0, -6.43839, -0.992266, 0.046329  
C, 0, -7.116973, -0.722755, -1.291043  
C, 0, -7.600827, 0.724229, -1.413622  
C, 0, -5.056605, -0.432254, 0.155781  
C, 0, -4.012956, -1.336465, -0.020029  
C, 0, -2.711207, -0.832717, 0.058243  
C, 0, -2.510746, 0.554346, 0.307129  
C, 0, -3.567123, 1.44487, 0.481808  
C, 0, -4.86492, 0.93601, 0.402016  
N, 0, -1.143025, 0.695225, 0.320619  
C, 0, -0.582248, -0.55744, 0.096301  
N, 0, -1.514137, -1.486248, -0.065653  
C, 0, 0.853805, -0.796218, 0.050996  
C, 0, 1.780159, 0.26316, 0.075328  
C, 0, 3.126309, -0.070465, 0.033253  
C, 0, 3.581749, -1.415905, -0.033521  
C, 0, 2.646633, -2.461085, -0.062173  
C, 0, 1.299919, -2.141546, -0.020824  
N, 0, 4.284928, 0.681787, 0.034615  
C, 0, 5.353954, -0.198255, -0.024544  
N, 0, 4.953232, -1.458967, -0.06657  
C, 0, 6.749539, 0.228079, -0.037764  
C, 0, 7.757566, -0.756266, -0.069712  
C, 0, 9.097043, -0.406313, -0.082871  
C, 0, 9.466784, 0.946895, -0.064657  
C, 0, 8.478049, 1.938835, -0.033953  
C, 0, 7.135166, 1.577508, -0.020991  
O, 0, 10.795296, 1.228816, -0.078616  
H, 0, -8.449672, 3.161376, -0.887406  
H, 0, -9.163379, 2.832512, 0.69983  
H, 0, -9.900398, 2.135779, -0.770151  
H, 0, -8.994376, 0.671626, 1.646694  
H, 0, -9.362299, -0.404344, 0.300354  
H, 0, -7.729638, -1.611214, 1.634891  
H, 0, -6.781431, -0.140689, 1.955227  
H, 0, -6.29875, -2.005078, 0.073661  
H, 0, -7.952413, -1.425938, -1.340912  
H, 0, -6.397315, -0.97708, -2.070643  
H, 0, -6.801184, 1.365861, -1.79868  
H, 0, -8.406377, 0.716863, -2.169566  
H, 0, -4.174055, -2.396371, -0.204882



H, 0, -3.406105, 2.50075, 0.675177  
H, 0, -5.723252, 1.587466, 0.527768  
H, 0, -0.635897, 1.542885, 0.526859  
H, 0, 1.467644, 1.303927, 0.103177  
H, 0, 2.981772, -3.491639, -0.115154  
H, 0, 0.548921, -2.92285, -0.04019  
H, 0, 4.343323, 1.687328, 0.083577  
H, 0, 7.461215, -1.799306, -0.083739  
H, 0, 9.875904, -1.161291, -0.107043  
H, 0, 8.759313, 2.989603, -0.02149  
H, 0, 6.393694, 2.372492, -0.000961  
H, 0, 10.927694, 2.19003, -0.064453

## H-bz1-aI

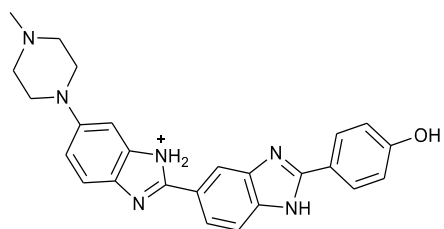

C,0,-10.5562021505,0.5523125944,-0.327570119  
N,0,-9.22017475,0.1978042562,0.1380437161  
C,0,-8.6790239144,-0.9558501142,-0.5662807454  
C,0,-7.3481756669,-1.3973284212,0.0446560736  
N,0,-6.3896145154,-0.285379492,0.0749154742  
C,0,-6.9509702929,0.9364818764,0.6760192012  
C,0,-8.286316457,1.3093403381,0.0361008842  
C,0,-5.034153489,-0.5459875849,0.1485955854  
C,0,-4.086206953,0.5167411976,0.0506346139  
C,0,-2.7564480818,0.1754170127,0.0745840241  
C,0,-2.254591494,-1.1240417207,0.1882641196  
C,0,-3.1691701894,-2.1685739777,0.2929983868  
C,0,-4.5284101749,-1.8704233389,0.2804588871  
N,0,-0.8572047836,-1.1554378997,0.1829000843  
C,0,-0.3846982996,0.0232548749,0.069358297  
N,0,-1.5783664914,1.0613892405,-0.0174322849  
C,0,0.9644884138,0.5277088036,0.0047830701  
C,0,2.0122272169,-0.4138955048,0.0688288844  
C,0,3.3196588548,0.0533096788,0.0083808623  
C,0,3.5706185154,1.4509985839,-0.1152675741  
C,0,2.5437605201,2.3944291198,-0.1797316063  
C,0,1.2414871878,1.9157804558,-0.1179757257  
N,0,4.5042002614,-0.6464583541,0.049286771  
C,0,5.4584822919,0.2603786271,-0.0435113214  
N,0,4.9365729315,1.5499527878,-0.1453738834  
C,0,6.8878558974,-0.0226189074,-0.0424331146  
C,0,7.8655280948,0.9854193257,-0.1374748094  
C,0,9.2165617225,0.6754158037,-0.1332447958  
C,0,9.6229192713,-0.6632099907,-0.0327634791  
C,0,8.6608199592,-1.6797729245,0.062976402  
C,0,7.3112362236,-1.3600270839,0.0579607426  
O,0,10.9563031092,-0.9053974222,-0.0337448389  
H,0,-10.9376333628,1.3925767572,0.2613459371  
H,0,-11.2308065025,-0.2974926939,-0.1833798707  
H,0,-10.5822494161,0.8375523208,-1.3959546822  
H,0,-9.3854237198,-1.7892253646,-0.4852506212  
H,0,-8.5304336721,-0.7490510215,-1.6452541731  
H,0,-7.5191430192,-1.7908159218,1.0590972097  
H,0,-6.9414525078,-2.1994067416,-0.5752166666  
H,0,-6.2582281331,1.7696618751,0.5528007624  
H,0,-7.0999634227,0.7765925382,1.7551306165  
H,0,-8.1168193702,1.6164984871,-1.0160536696  
H,0,-8.6969238093,2.1729640756,0.5711982585  
H,0,-4.4037080181,1.5444075474,-0.0752136572  
H,0,-2.8270628927,-3.1921063543,0.4015936114

H, 0, -5.222213764, -2.6914791361, 0.4010465104  
H, 0, -1.522739627, 1.7393045912, 0.7512510495  
H, 0, -1.5330666022, 1.5869367448, -0.8981538243  
H, 0, 1.7991392345, -1.4725211736, 0.1622663899  
H, 0, 2.7410202734, 3.4575378267, -0.2734541904  
H, 0, 0.4352520934, 2.6436516088, -0.1661683648  
H, 0, 5.469323436, 2.4032878248, -0.2288215551  
H, 0, 7.5845745244, 2.0327689565, -0.2157784252  
H, 0, 9.9730879187, 1.4492912306, -0.2060774922  
H, 0, 8.9731748494, -2.7188480472, 0.1410798072  
H, 0, 6.5617534789, -2.1403476124, 0.1315754371  
H, 0, 11.119481263, -1.8594731586, 0.0401158212

## H-bz1-aII

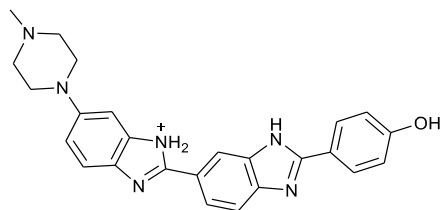

C, 0, 9.8303929898, 2.525466392, 0.3224142653  
N, 0, 8.7032123836, 1.7160544504, -0.1268477536  
C, 0, 8.5659240881, 0.4870079045, 0.6414709718  
C, 0, 7.4769815893, -0.4101660405, 0.0510724219  
N, 0, 6.200693264, 0.3091530021, -0.0487639116  
C, 0, 6.3314821663, 1.6152331503, -0.7169839882  
C, 0, 7.4473838802, 2.4506129595, -0.0937281094  
C, 0, 5.0154785621, -0.3993784306, -0.1190716707  
C, 0, 3.7616847713, 0.281885638, -0.0863676411  
C, 0, 2.6268861374, -0.4911254882, -0.1025308973  
C, 0, 2.596840377, -1.887948354, -0.1497530159  
C, 0, 3.8141670016, -2.5634158781, -0.1901177881  
C, 0, 4.9913375871, -1.8215045685, -0.1826851321  
N, 0, 1.2948726336, -2.391961963, -0.1540760606  
C, 0, 0.4460219154, -1.4389959482, -0.1080689731  
N, 0, 1.2161504141, -0.0534060557, -0.0677061473  
C, 0, -0.9909545422, -1.4214234166, -0.0824387927  
C, 0, -1.7317986207, -0.2185741427, -0.033955321  
C, 0, -3.1122070968, -0.3282241718, -0.0124809331  
C, 0, -3.7833941063, -1.5864049794, -0.0382117412  
C, 0, -3.0327040551, -2.7729774066, -0.0870221543  
C, 0, -1.6541389671, -2.6819051813, -0.1083593445  
N, 0, -4.1327340302, 0.5989157081, 0.033145773  
C, 0, -5.3317755693, -0.0973488749, 0.0335641967  
N, 0, -5.1372417698, -1.4098378971, -0.0090517881  
C, 0, -6.6357584415, 0.5453289068, 0.0759158162  
C, 0, -6.7978973693, 1.9435688625, 0.1215108825  
C, 0, -8.0583752156, 2.5169782939, 0.1610882431  
C, 0, -9.1968113607, 1.6962152322, 0.1559051334  
C, 0, -9.0527431669, 0.3012199267, 0.110737416  
C, 0, -7.787213721, -0.2638433229, 0.0713315127  
O, 0, -10.401160048, 2.3137899886, 0.1958685471  
H, 0, 9.9202050734, 3.4121016355, -0.3133273904  
H, 0, 10.7550261136, 1.9469131986, 0.231018547  
H, 0, 9.7336930393, 2.8599243245, 1.3723092091  
H, 0, 9.5136297558, -0.0616894075, 0.6126604812  
H, 0, 8.3303450592, 0.6890160748, 1.7057559948  
H, 0, 7.7954075156, -0.7763302464, -0.9377385011  
H, 0, 7.3491808728, -1.2682301408, 0.7147486823  
H, 0, 5.3955557739, 2.1704659295, -0.6449466675  
H, 0, 6.5511204791, 1.4585995225, -1.7844784248  
H, 0, 7.1592971168, 2.7378859038, 0.9380938794  
H, 0, 7.5556681665, 3.372492147, -0.6761474076  
H, 0, 3.7097484928, 1.361194619, -0.0136895498  
H, 0, 3.8417799231, -3.6462769088, -0.2457345776

H,0,5.9250026711,-2.3632467539,-0.2524943622  
H,0,0.9557830844,0.527459919,-0.8726864605  
H,0,0.9749419896,0.4667616082,0.7836485238  
H,0,-1.2563477698,0.7595771188,-0.0144780166  
H,0,-3.5339565448,-3.7346901155,-0.1068597907  
H,0,-1.0453310553,-3.5781955589,-0.14543457  
H,0,-4.030480778,1.6021288232,0.0609638893  
H,0,-5.9362822164,2.6067907524,0.1268486813  
H,0,-8.1885660963,3.5932325449,0.1963203113  
H,0,-9.9335669678,-0.3369549676,0.1066380008  
H,0,-7.667087845,-1.3409610259,0.0363125142  
H,0,-11.1133645336,1.6539797084,0.1882139888

H-bz1-bI

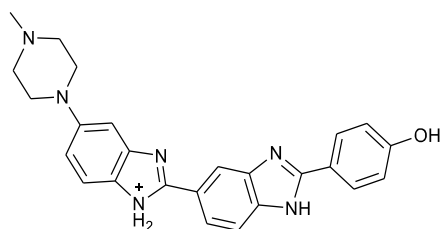

|   |   |           |          |          |
|---|---|-----------|----------|----------|
| C | 0 | -9.53671  | 2.89545  | 0.29184  |
| N | 0 | -8.47399  | 1.99871  | -0.14798 |
| C | 0 | -7.16056  | 2.62343  | -0.07937 |
| C | 0 | -6.10471  | 1.70634  | -0.69144 |
| N | 0 | -6.09883  | 0.38216  | -0.04551 |
| C | 0 | -7.43287  | -0.2249  | 0.03154  |
| C | 0 | -8.45462  | 0.75607  | 0.60928  |
| C | 0 | -4.97207  | -0.41305 | -0.07791 |
| C | 0 | -3.67015  | 0.16634  | -0.08126 |
| C | 0 | -2.56752  | -0.66359 | -0.05842 |
| C | 0 | -2.70755  | -2.05543 | -0.03808 |
| C | 0 | -3.94537  | -2.66601 | -0.04818 |
| C | 0 | -5.06679  | -1.83561 | -0.07691 |
| N | 0 | -1.34922  | -2.61785 | -0.01286 |
| C | 0 | -0.46613  | -1.31001 | -0.01884 |
| N | 0 | -1.21426  | -0.27879 | -0.04325 |
| C | 0 | 0.96842   | -1.45505 | 0.00009  |
| C | 0 | 1.73875   | -0.27353 | -0.01247 |
| C | 0 | 3.1228    | -0.39229 | 0.00456  |
| C | 0 | 3.72477   | -1.68451 | 0.03398  |
| C | 0 | 2.97486   | -2.86259 | 0.047    |
| C | 0 | 1.59306   | -2.73105 | 0.02972  |
| N | 0 | 4.08847   | 0.58834  | -0.0029  |
| C | 0 | 5.24427   | -0.04788 | 0.02059  |
| N | 0 | 5.07006   | -1.4326  | 0.04364  |
| C | 0 | 6.55413   | 0.58951  | 0.02257  |
| C | 0 | 7.75766   | -0.14006 | 0.04889  |
| C | 0 | 8.98514   | 0.50356  | 0.0497   |
| C | 0 | 9.03595   | 1.9051   | 0.02393  |
| C | 0 | 7.84531   | 2.64686  | -0.00244 |
| C | 0 | 6.62165   | 1.99418  | -0.00302 |
| O | 0 | 10.26364  | 2.47812  | 0.02602  |
| H | 0 | -10.50549 | 2.39899  | 0.17624  |
| H | 0 | -9.53857  | 3.79412  | -0.33324 |
| H | 0 | -9.43187  | 3.20825  | 1.34771  |
| H | 0 | -7.17748  | 3.55814  | -0.65088 |
| H | 0 | -6.87286  | 2.87283  | 0.962    |
| H | 0 | -6.31103  | 1.58489  | -1.76583 |
| H | 0 | -5.12918  | 2.17955  | -0.58719 |
| H | 0 | -7.39273  | -1.0919  | 0.6944   |
| H | 0 | -7.76375  | -0.56056 | -0.964   |
| H | 0 | -8.2237   | 0.92853  | 1.67997  |
| H | 0 | -9.44399  | 0.28818  | 0.55757  |
| H | 0 | -3.51332  | 1.23601  | -0.07009 |
| H | 0 | -4.07059  | -3.74473 | -0.05314 |

|   |   |          |          |          |
|---|---|----------|----------|----------|
| H | 0 | -6.03571 | -2.31224 | -0.12663 |
| H | 0 | -1.12566 | -3.2004  | -0.82946 |
| H | 0 | -1.14934 | -3.17753 | 0.82538  |
| H | 0 | 1.2592   | 0.6982   | -0.03514 |
| H | 0 | 3.43976  | -3.84295 | 0.06971  |
| H | 0 | 1.00078  | -3.64251 | 0.04013  |
| H | 0 | 5.80448  | -2.12502 | 0.06349  |
| H | 0 | 7.75378  | -1.22704 | 0.06933  |
| H | 0 | 9.91484  | -0.05478 | 0.06994  |
| H | 0 | 7.88186  | 3.73385  | -0.02244 |
| H | 0 | 5.6972   | 2.56078  | -0.02335 |
| H | 0 | 10.17832 | 3.44495  | 0.00707  |

# H-bz1-bII

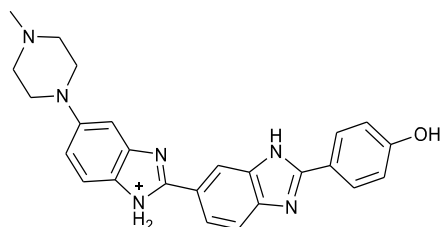

|   |   |           |          |          |
|---|---|-----------|----------|----------|
| C | 0 | 10.44846  | -0.94832 | 0.36453  |
| N | 0 | 9.14755   | -0.48094 | -0.10034 |
| C | 0 | 8.12741   | -1.51679 | -0.01953 |
| C | 0 | 6.82771   | -1.03139 | -0.65643 |
| N | 0 | 6.3612    | 0.22404  | -0.04249 |
| C | 0 | 7.4049    | 1.25382  | 0.02064  |
| C | 0 | 8.69508   | 0.69679  | 0.62506  |
| C | 0 | 5.03004   | 0.58243  | -0.09339 |
| C | 0 | 4.00683   | -0.40897 | -0.07818 |
| C | 0 | 2.68518   | -0.00932 | -0.07452 |
| C | 0 | 2.33921   | 1.34659  | -0.09144 |
| C | 0 | 3.29174   | 2.34492  | -0.12073 |
| C | 0 | 4.63055   | 1.95059  | -0.13013 |
| N | 0 | 0.86978   | 1.40947  | -0.07722 |
| C | 0 | 0.48881   | -0.12312 | -0.04543 |
| N | 0 | 1.5484    | -0.83484 | -0.04495 |
| C | 0 | -0.90375  | -0.47886 | -0.02454 |
| C | 0 | -1.9316   | 0.49235  | -0.0285  |
| C | 0 | -3.23562  | 0.02957  | -0.00714 |
| C | 0 | -3.55761  | -1.36062 | 0.01816  |
| C | 0 | -2.52463  | -2.31344 | 0.02194  |
| C | 0 | -1.21703  | -1.86837 | 0.00072  |
| N | 0 | -4.46237  | 0.66087  | -0.00363 |
| C | 0 | -5.43925  | -0.32181 | 0.02243  |
| N | 0 | -4.90993  | -1.54037 | 0.0357   |
| C | 0 | -6.86522  | -0.03983 | 0.03356  |
| C | 0 | -7.38585  | 1.26897  | 0.01878  |
| C | 0 | -8.7522   | 1.49538  | 0.03011  |
| C | 0 | -9.63793  | 0.40666  | 0.05675  |
| C | 0 | -9.13561  | -0.90358 | 0.07174  |
| C | 0 | -7.76644  | -1.12073 | 0.06024  |
| O | 0 | -10.96122 | 0.69064  | 0.0667   |
| H | 0 | 11.18949  | -0.15245 | 0.23868  |
| H | 0 | 10.76519  | -1.80593 | -0.23757 |
| H | 0 | 10.44575  | -1.25378 | 1.42773  |
| H | 0 | 8.4701    | -2.40139 | -0.56784 |
| H | 0 | 7.93153   | -1.82656 | 1.02694  |
| H | 0 | 6.99179   | -0.86947 | -1.73277 |
| H | 0 | 6.07233   | -1.80805 | -0.54409 |
| H | 0 | 7.06296   | 2.06977  | 0.66092  |
| H | 0 | 7.61087   | 1.659    | -0.98271 |
| H | 0 | 8.526     | 0.48047  | 1.69935  |
| H | 0 | 9.4645    | 1.47441  | 0.56343  |
| H | 0 | 4.22774   | -1.46658 | -0.03759 |



|   |   |          |          |          |
|---|---|----------|----------|----------|
| H | 0 | 3.03864  | 3.40051  | -0.15454 |
| H | 0 | 5.37704  | 2.72971  | -0.1949  |
| H | 0 | 0.46683  | 1.85844  | -0.90901 |
| H | 0 | 0.48628  | 1.88829  | 0.74686  |
| H | 0 | -1.72596 | 1.56013  | -0.04712 |
| H | 0 | -2.75982 | -3.37209 | 0.04114  |
| H | 0 | -0.39579 | -2.57607 | 0.0029   |
| H | 0 | -4.62405 | 1.65662  | -0.0172  |
| H | 0 | -6.72649 | 2.13326  | -0.00191 |
| H | 0 | -9.15842 | 2.50102  | 0.01881  |
| H | 0 | -9.82015 | -1.74859 | 0.09237  |
| H | 0 | -7.36996 | -2.12992 | 0.07167  |
| H | 0 | -11.4781 | -0.13108 | 0.08525  |

H-bz2-a

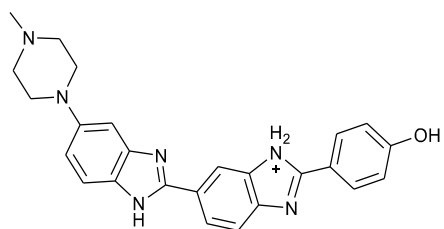

|   |   |          |          |          |
|---|---|----------|----------|----------|
| C | 0 | 10.52746 | -0.86307 | -0.11388 |
| N | 0 | 9.12241  | -0.67239 | 0.21784  |
| C | 0 | 8.77832  | 0.73711  | 0.36413  |
| C | 0 | 7.32963  | 0.88371  | 0.8219   |
| N | 0 | 6.41646  | 0.21904  | -0.12141 |
| C | 0 | 6.77708  | -1.18337 | -0.32273 |
| C | 0 | 8.23845  | -1.3007  | -0.75687 |
| C | 0 | 5.05239  | 0.54652  | -0.05853 |
| C | 0 | 4.04735  | -0.42436 | -0.00904 |
| C | 0 | 2.70662  | -0.00754 | -0.01793 |
| C | 0 | 2.37654  | 1.36855  | -0.05486 |
| C | 0 | 3.3648   | 2.35698  | -0.10005 |
| C | 0 | 4.68029  | 1.92869  | -0.10977 |
| N | 0 | 0.9956   | 1.40507  | -0.03954 |
| C | 0 | 0.55664  | 0.09343  | 0.01769  |
| N | 0 | 1.5602   | -0.76783 | 0.02873  |
| C | 0 | -0.84104 | -0.31133 | 0.05378  |
| C | 0 | -1.90802 | 0.61354  | -0.04208 |
| C | 0 | -3.18133 | 0.09099  | 0.00417  |
| C | 0 | -3.47974 | -1.26953 | 0.13493  |
| C | 0 | -2.42937 | -2.18411 | 0.22647  |
| C | 0 | -1.13053 | -1.69194 | 0.1843   |
| N | 0 | -4.48009 | 0.79116  | -0.07504 |
| C | 0 | -5.4995  | -0.41009 | 0.03735  |
| N | 0 | -4.85694 | -1.50712 | 0.14996  |
| C | 0 | -6.90826 | -0.12349 | -0.00012 |
| C | 0 | -7.81209 | -1.2094  | 0.10292  |
| C | 0 | -9.17464 | -0.99637 | 0.0727   |
| C | 0 | -9.68116 | 0.31043  | -0.06171 |
| C | 0 | -8.79741 | 1.39775  | -0.16504 |
| C | 0 | -7.4283  | 1.17875  | -0.13414 |
| O | 0 | -11.02   | 0.44404  | -0.0838  |
| H | 0 | 10.75177 | -1.93401 | -0.16094 |
| H | 0 | 11.15288 | -0.41879 | 0.66774  |
| H | 0 | 10.81248 | -0.40892 | -1.08251 |
| H | 0 | 9.43546  | 1.18568  | 1.11834  |
| H | 0 | 8.92043  | 1.29806  | -0.58181 |
| H | 0 | 7.22288  | 0.44326  | 1.82782  |
| H | 0 | 7.0794   | 1.94375  | 0.89466  |
| H | 0 | 6.14058  | -1.59963 | -1.10932 |
| H | 0 | 6.62193  | -1.77656 | 0.59575  |
| H | 0 | 8.35133  | -0.85224 | -1.76444 |
| H | 0 | 8.49771  | -2.36277 | -0.83695 |
| H | 0 | 4.26955  | -1.48191 | 0.05192  |
| H | 0 | 3.12641  | 3.41539  | -0.14766 |

|   |   |           |          |          |
|---|---|-----------|----------|----------|
| H | 0 | 5.46398   | 2.67312  | -0.19596 |
| H | 0 | 0.43562   | 2.24336  | -0.01556 |
| H | 0 | -1.73338  | 1.67886  | -0.15638 |
| H | 0 | -2.6294   | -3.24513 | 0.32728  |
| H | 0 | -0.2849   | -2.36705 | 0.25072  |
| H | 0 | -4.61246  | 1.29594  | -0.95967 |
| H | 0 | -4.62487  | 1.46097  | 0.68991  |
| H | 0 | -7.41706  | -2.21418 | 0.20621  |
| H | 0 | -9.87432  | -1.82143 | 0.15092  |
| H | 0 | -9.18407  | 2.40814  | -0.26902 |
| H | 0 | -6.77517  | 2.04481  | -0.21706 |
| H | 0 | -11.27539 | 1.37656  | -0.17894 |

H-bz2-bI

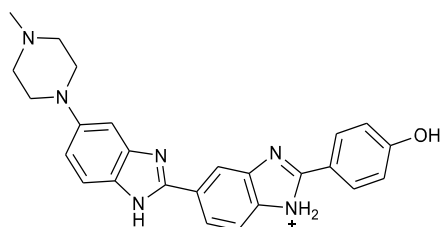

|   |   |           |          |          |
|---|---|-----------|----------|----------|
| C | 0 | -10.52775 | 0.686    | -0.03679 |
| N | 0 | -9.11356  | 0.53097  | 0.27335  |
| C | 0 | -8.72738  | -0.87052 | 0.39186  |
| C | 0 | -7.26813  | -0.9833  | 0.82498  |
| N | 0 | -6.38956  | -0.27889 | -0.12214 |
| C | 0 | -6.79148  | 1.11613  | -0.29107 |
| C | 0 | -8.26158  | 1.20034  | -0.70269 |
| C | 0 | -5.01409  | -0.56638 | -0.07651 |
| C | 0 | -4.03864  | 0.43256  | -0.00913 |
| C | 0 | -2.68571  | 0.05636  | -0.03703 |
| C | 0 | -2.31558  | -1.30778 | -0.1074  |
| C | 0 | -3.27483  | -2.3239  | -0.17142 |
| C | 0 | -4.60221  | -1.93479 | -0.16408 |
| N | 0 | -0.93473  | -1.30438 | -0.09758 |
| C | 0 | -0.53462  | 0.01598  | -0.02045 |
| N | 0 | -1.56111  | 0.84921  | 0.01721  |
| C | 0 | 0.85465   | 0.45586  | 0.01573  |
| C | 0 | 1.93954   | -0.4443  | -0.04124 |
| C | 0 | 3.22532   | 0.07413  | -0.00047 |
| C | 0 | 3.4256    | 1.45414  | 0.09431  |
| C | 0 | 2.3904    | 2.37053  | 0.15195  |
| C | 0 | 1.09843   | 1.84689  | 0.11094  |
| N | 0 | 4.44114   | -0.62919 | -0.04389 |
| C | 0 | 5.41997   | 0.18589  | 0.01517  |
| N | 0 | 4.88522   | 1.66298  | 0.11402  |
| C | 0 | 6.84285   | -0.03221 | 0.00501  |
| C | 0 | 7.31258   | -1.36509 | -0.08529 |
| C | 0 | 8.66517   | -1.63519 | -0.09959 |
| C | 0 | 9.59485   | -0.58031 | -0.02395 |
| C | 0 | 9.14394   | 0.74771  | 0.06616  |
| C | 0 | 7.78333   | 1.01367  | 0.08013  |
| O | 0 | 10.89683  | -0.91618 | -0.043   |
| H | 0 | -10.7836  | 1.75061  | -0.06347 |
| H | 0 | -11.12956 | 0.2112   | 0.74548  |
| H | 0 | -10.81278 | 0.2393   | -1.00896 |
| H | 0 | -9.36027  | -1.34918 | 1.14837  |
| H | 0 | -8.86832  | -1.42007 | -0.56085 |
| H | 0 | -7.15801  | -0.55643 | 1.8366   |
| H | 0 | -6.98705  | -2.0369  | 0.87627  |
| H | 0 | -6.17774  | 1.56498  | -1.07799 |
| H | 0 | -6.64053  | 1.69685  | 0.63634  |
| H | 0 | -8.3766   | 0.76604  | -1.71619 |
| H | 0 | -8.55184  | 2.25591  | -0.76049 |
| H | 0 | -4.29254  | 1.48117  | 0.07827  |
| H | 0 | -3.00469  | -3.37305 | -0.24561 |

|   |   |          |          |          |
|---|---|----------|----------|----------|
| H | 0 | -5.36477 | -2.69934 | -0.26373 |
| H | 0 | -0.34518 | -2.12192 | -0.1383  |
| H | 0 | 1.80559  | -1.51751 | -0.1164  |
| H | 0 | 2.5523   | 3.44162  | 0.22526  |
| H | 0 | 0.23815  | 2.50484  | 0.15158  |
| H | 0 | 5.21908  | 2.11235  | 0.97617  |
| H | 0 | 5.2252   | 2.22517  | -0.67657 |
| H | 0 | 6.59207  | -2.17364 | -0.14334 |
| H | 0 | 9.0352   | -2.65237 | -0.16853 |
| H | 0 | 9.85834  | 1.56459  | 0.12476  |
| H | 0 | 7.47174  | 2.05344  | 0.15079  |
| H | 0 | 11.46176 | -0.12763 | 0.01294  |

H-bz2-bII

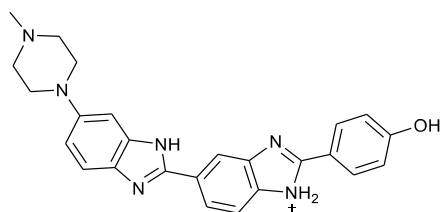

|   |   |           |          |          |
|---|---|-----------|----------|----------|
| C | 0 | -9.90757  | 2.42166  | 0.10369  |
| N | 0 | -8.60868  | 1.86711  | -0.25301 |
| C | 0 | -7.56428  | 2.27575  | 0.67759  |
| C | 0 | -6.19344  | 1.77986  | 0.21413  |
| N | 0 | -6.20306  | 0.32879  | 0.03999  |
| C | 0 | -7.29418  | -0.11367 | -0.84279 |
| C | 0 | -8.63978  | 0.41222  | -0.35113 |
| C | 0 | -4.98699  | -0.35727 | 0.01207  |
| C | 0 | -3.75507  | 0.31873  | -0.0037  |
| C | 0 | -2.59598  | -0.45689 | 0.03233  |
| C | 0 | -2.60405  | -1.87357 | 0.06404  |
| C | 0 | -3.84196  | -2.54379 | 0.07775  |
| C | 0 | -4.99614  | -1.79152 | 0.05676  |
| N | 0 | -1.32403  | -2.36519 | 0.07821  |
| C | 0 | -0.53408  | -1.30496 | 0.05284  |
| N | 0 | -1.25826  | -0.12049 | 0.02439  |
| C | 0 | 0.91714   | -1.38584 | 0.05311  |
| C | 0 | 1.74312   | -0.24067 | 0.01283  |
| C | 0 | 3.11766   | -0.42197 | 0.01694  |
| C | 0 | 3.66027   | -1.70917 | 0.05991  |
| C | 0 | 2.88733   | -2.85764 | 0.09992  |
| C | 0 | 1.506     | -2.67419 | 0.0959   |
| N | 0 | 4.11788   | 0.56543  | -0.0184  |
| C | 0 | 5.27023   | 0.02033  | -0.00158 |
| N | 0 | 5.12526   | -1.54539 | 0.05214  |
| C | 0 | 6.59297   | 0.58936  | -0.02302 |
| C | 0 | 6.71191   | 1.9994   | -0.07168 |
| C | 0 | 7.95322   | 2.60083  | -0.09395 |
| C | 0 | 9.1188    | 1.81143  | -0.06827 |
| C | 0 | 9.01688   | 0.41078  | -0.02    |
| C | 0 | 7.76671   | -0.18859 | 0.00219  |
| O | 0 | 10.29484  | 2.46389  | -0.09217 |
| H | 0 | -10.65002 | 2.12788  | -0.64574 |
| H | 0 | -9.84967  | 3.51526  | 0.11443  |
| H | 0 | -10.26744 | 2.08599  | 1.09522  |
| H | 0 | -7.54204  | 3.3706   | 0.72801  |
| H | 0 | -7.75457  | 1.89829  | 1.70252  |
| H | 0 | -5.91658  | 2.29471  | -0.72255 |
| H | 0 | -5.45482  | 2.03708  | 0.97875  |
| H | 0 | -7.3235   | -1.20292 | -0.88068 |
| H | 0 | -7.1172   | 0.2537   | -1.86733 |
| H | 0 | -8.88601  | -0.06264 | 0.61997  |
| H | 0 | -9.4154   | 0.12171  | -1.06915 |
| H | 0 | -3.70078  | 1.39812  | -0.07125 |
| H | 0 | -3.87966  | -3.62745 | 0.12272  |

|   |   |          |          |          |
|---|---|----------|----------|----------|
| H | 0 | -5.94995 | -2.3024  | 0.11771  |
| H | 0 | -0.89115 | 0.81877  | 0.00379  |
| H | 0 | 1.34387  | 0.76663  | -0.02202 |
| H | 0 | 3.31344  | -3.85573 | 0.13296  |
| H | 0 | 0.84037  | -3.52895 | 0.12569  |
| H | 0 | 5.57853  | -1.97895 | -0.76241 |
| H | 0 | 5.58108  | -1.92238 | 0.89299  |
| H | 0 | 5.81072  | 2.60249  | -0.0913  |
| H | 0 | 8.05504  | 3.68     | -0.13122 |
| H | 0 | 9.91417  | -0.20209 | -0.00007 |
| H | 0 | 7.72697  | -1.27496 | 0.0396   |
| H | 0 | 11.03987 | 1.84057  | -0.07175 |

## H-phe-al

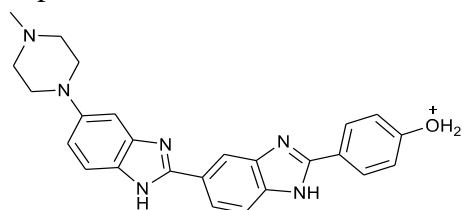

C,0,9.59383341,2.8165396471,0.0548365238  
N,0,8.3125676193,2.1930619234,-0.2401540054  
C,0,8.4552648791,0.7807593233,-0.5791229518  
C,0,7.1041510558,0.1889259805,-0.9722576369  
N,0,6.1284225907,0.3661518947,0.1127209257  
C,0,5.9971127974,1.7733562598,0.4788347273  
C,0,7.3617949924,2.3507160942,0.855476643  
C,0,4.9456051395,-0.4052396226,0.0417238773  
C,0,3.6708772145,0.1664895988,0.0966325611  
C,0,2.5508521089,-0.6790873732,0.0798895901  
C,0,2.7103691972,-2.079554671,-0.0115786451  
C,0,3.9746749828,-2.6714214256,-0.0721110513  
C,0,5.0706830861,-1.8240601033,-0.0350136483  
N,0,1.4211972025,-2.5827767896,-0.0117017551  
C,0,0.5623276767,-1.5020067876,0.0630410506  
N,0,1.2089545012,-0.3529976223,0.1226170952  
C,0,-0.898779734,-1.6175339252,0.0754675525  
C,0,-1.6546814388,-0.4454281419,0.0077574231  
C,0,-3.0492324862,-0.5531212105,0.0222568446  
C,0,-3.671992492,-1.8268075937,0.102374054  
C,0,-2.9319294459,-3.0094952956,0.1744804872  
C,0,-1.5508709184,-2.8795953811,0.1614902809  
N,0,-4.0057132352,0.4372988791,-0.0340048923  
C,0,-5.1674396041,-0.1867902839,0.0095523577  
N,0,-5.0261295333,-1.5611663994,0.0920757791  
C,0,-6.4421853355,0.5192227297,-0.0263364421  
C,0,-6.4034511641,1.9296208167,-0.109303335  
C,0,-7.5726013072,2.6782654994,-0.1475301438  
C,0,-8.7609636556,1.9663014811,-0.0999813387  
C,0,-8.8816522707,0.594098588,-0.0190265379  
C,0,-7.6902345586,-0.1310652684,0.0176821649  
O,0,-10.0614741695,2.728824695,-0.138021101  
H,0,9.4473188025,3.8843106955,0.2512372258  
H,0,10.2589461497,2.7179268719,-0.8100392395  
H,0,10.103941336,2.3731405243,0.9323630002  
H,0,9.1462285875,0.6895841841,-1.4258104045  
H,0,8.8766609439,0.1957572471,0.2633578428  
H,0,6.749512287,0.6805588241,-1.8954725741  
H,0,7.2237094438,-0.8749575753,-1.1876695943  
H,0,5.3269972336,1.8508732576,1.3406689389  
H,0,5.5674452667,2.37333657,-0.3441596978  
H,0,7.7174960145,1.8571364092,1.7822396088  
H,0,7.24855048,3.4197372544,1.0721280869  
H,0,3.5225828227,1.2383958441,0.1386831325  
H,0,4.1082682988,-3.7482215326,-0.1241686633



H, 0, 6.0652232059, -2.2575999301, -0.02984614  
H, 0, 1.1683351457, -3.5525725048, -0.121773484  
H, 0, -1.1572475515, 0.5153207291, -0.0525546267  
H, 0, -3.4015802872, -3.9856892272, 0.2440046988  
H, 0, -0.9581299496, -3.786280406, 0.2362842832  
H, 0, -5.7589467661, -2.2531747108, 0.1398376097  
H, 0, -5.4345027831, 2.4148554387, -0.1423223775  
H, 0, -7.5395732806, 3.7622287986, -0.2111083006  
H, 0, -9.8490215442, 0.1053483718, 0.0142433116  
H, 0, -7.7556699357, -1.212050687, 0.0810505493  
H, 0, -10.2009972739, 3.23085263, -0.9709841859  
H, 0, -10.1936957512, 3.3232824075, 0.6330035464

## H-phe-aII

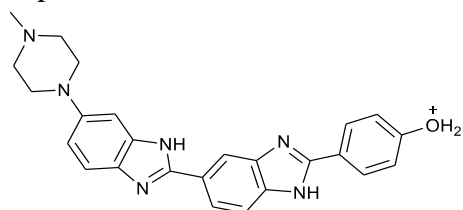

C,0,-10.5942524139,0.2889092019,0.186627111  
N,0,-9.1815437436,0.2672387054,-0.1631252847  
C,0,-8.3598240362,0.9392485708,0.8370010988  
C,0,-6.8969000472,0.9927620471,0.3945234512  
N,0,-6.3951478672,-0.3528267115,0.1334365944  
C,0,-7.236339811,-1.0608225439,-0.8427518139  
C,0,-8.6904961225,-1.0897824854,-0.3801547881  
C,0,-5.0019464239,-0.5398210288,0.0513467344  
C,0,-4.1070613965,0.5402292176,0.0248431779  
C,0,-2.7423758332,0.2438891951,0.0018291846  
C,0,-2.2317315156,-1.0736420401,-0.0161861137  
C,0,-3.1351977201,-2.1488777525,0.0054384688  
C,0,-4.4888003329,-1.8727798745,0.0462197947  
N,0,-0.8528616098,-1.0600260876,-0.0490722458  
C,0,-0.5114446298,0.2131242825,-0.0554981705  
N,0,-1.6197595434,1.0486431497,-0.0301111906  
C,0,0.872663603,0.6893318336,-0.0884619633  
C,0,1.90027677,-0.2520002254,0.0097406099  
C,0,3.2226177056,0.201555451,-0.024829783  
C,0,3.5057838736,1.5872320861,-0.1548017293  
C,0,2.4919692494,2.5428755273,-0.2567765856  
C,0,1.1878806992,2.0712211005,-0.2229253735  
N,0,4.3975312795,-0.5146646185,0.0527188656  
C,0,5.3653344913,0.3789983349,-0.0256234854  
N,0,4.8832763258,1.6702181982,-0.1519757157  
C,0,6.7762946446,0.0170669444,0.017902455  
C,0,7.0930910838,-1.3544087783,0.1476038598  
C,0,8.4127027397,-1.7843540572,0.1959621238  
C,0,9.3843675908,-0.7994246658,0.1104546943  
C,0,9.1566410725,0.5556443957,-0.0169264036  
C,0,7.8213543923,0.9573761948,-0.0627389104  
O,0,10.8347702936,-1.2101628278,0.1574780092  
H,0,-11.1778147048,-0.1822552498,-0.611681952  
H,0,-10.9324603263,1.3258466961,0.2885106069  
H,0,-10.8178724563,-0.2399641544,1.1335946428  
H,0,-8.7286671609,1.9637551739,0.9664824587  
H,0,-8.4181205929,0.4357000317,1.822987899  
H,0,-6.8130842807,1.6404308509,-0.497329646  
H,0,-6.3025706355,1.4396141132,1.1974984797  
H,0,-6.8749028725,-2.0828866913,-0.9668055348  
H,0,-7.1811292001,-0.563342782,-1.8267131165  
H,0,-8.768755548,-1.7077580399,0.537084663  
H,0,-9.301821546,-1.5664878384,-1.1556032432  
H,0,-4.4561421537,1.565618444,-0.0006148161  
H,0,-2.7717723895,-3.171790905,0.0106078652  
H,0,-5.1906846575,-2.6968902526,0.1147658934

H, 0, -1.6189032092, 2.0557381285, 0.0177645948  
H, 0, 1.6613547613, -1.3042917124, 0.1082749185  
H, 0, 2.7009437784, 3.6028086506, -0.3630855273  
H, 0, 0.3866917305, 2.7979695024, -0.3174856336  
H, 0, 5.4187902179, 2.5216678905, -0.2319441141  
H, 0, 6.2768717641, -2.0653864815, 0.208380452  
H, 0, 8.652895645, -2.8391267177, 0.2954542615  
H, 0, 9.9703549283, 1.2697277659, -0.0780896312  
H, 0, 7.6132769311, 2.0173897857, -0.1623336429  
H, 0, 11.1085953609, -1.7792022015, -0.5951907044  
H, 0, 11.0983528485, -1.6323747462, 1.0045571502

## Ground State ( $S_0$ ) of 1+ Charge State at B3LYP/6-311+G(d,p)

### H-pipN2-I

C, 0, 7.2293997664, 3.4274807447, 1.7740666011  
N, 0, 7.2706732217, 2.4250463011, 0.6600292528  
C, 0, 7.3294727038, 0.9953013612, 1.1689210398  
C, 0, 7.4130519033, 0.0271676289, -0.0184873126  
N, 0, 6.3037795542, 0.1887206238, -0.9431314075  
C, 0, 6.2199603785, 1.5486650897, -1.4319221939  
C, 0, 6.1202930635, 2.6019600271, -0.3162987618  
C, 0, 5.0977188848, -0.549752797, -0.6835051701  
C, 0, 3.8538109956, 0.0719510109, -0.5747504198  
C, 0, 2.7214337219, -0.7246650013, -0.368128533  
C, 0, 2.8512848394, -2.1259019219, -0.2497928665  
C, 0, 4.0858552438, -2.7580403171, -0.3586048487  
C, 0, 5.1988604266, -1.9565136241, -0.5879149072  
N, 0, 1.5622257925, -2.5728809341, -0.0378784829  
C, 0, 0.7306165679, -1.4663840613, -0.0424927414  
N, 0, 1.4068042139, -0.3477248669, -0.2334109956  
C, 0, -0.7183171388, -1.5542084158, 0.1390234315  
C, 0, -1.4942695095, -0.4248198081, -0.1469184039  
C, 0, -2.8740104688, -0.5091625833, 0.0170470219  
C, 0, -3.4621690891, -1.7169831572, 0.4671214198  
C, 0, -2.7043216832, -2.847619478, 0.7630304547  
C, 0, -1.329700452, -2.7472388748, 0.5931420581  
N, 0, -3.8487084591, 0.4441305113, -0.1995577045  
C, 0, -4.9909425528, -0.1349155536, 0.0996717757  
N, 0, -4.811719507, -1.4481558971, 0.5144782899  
C, 0, -6.3034361893, 0.5028499601, 0.0146539021  
C, 0, -6.408779301, 1.7700897885, -0.5848703444  
C, 0, -7.630755782, 2.410424585, -0.6898030883  
C, 0, -8.7855278149, 1.7965473894, -0.1929996773  
C, 0, -8.6999660687, 0.5397165198, 0.4102332773  
C, 0, -7.4677829453, -0.0960037944, 0.5118720995  
O, 0, -9.9580956658, 2.4744213932, -0.3259124064  
H, 0, 7.2293823258, 4.4301814419, 1.3484621038  
H, 0, 6.31986952, 3.2676227649, 2.3506377586  
H, 0, 8.1031624057, 3.2874353925, 2.4091897107  
H, 0, 8.1347746395, 2.5858141189, 0.1325924209  
H, 0, 6.4190881049, 0.8337770735, 1.7487118912  
H, 0, 8.1983376442, 0.9222511371, 1.825765416  
H, 0, 7.4363358612, -0.9873555997, 0.3749253447  
H, 0, 8.360013905, 0.1850428852, -0.5531624315  
H, 0, 5.3633713703, 1.6589232944, -2.0967013909  
H, 0, 7.1150474363, 1.7594720546, -2.034453608  
H, 0, 5.2082800172, 2.4966287642, 0.2709381727  
H, 0, 6.1833534791, 3.6189592, -0.7080873006  
H, 0, 3.7152930229, 1.141795391, -0.6611331771  
H, 0, 4.1906897629, -3.8348330282, -0.2974989171  
H, 0, 6.1617135586, -2.4297565736, -0.7384387115  
H, 0, 1.2657364355, -3.5339438744, 0.0120707086  
H, 0, -1.0261154306, 0.4871234914, -0.492198806  
H, 0, -3.1539773172, -3.7670437163, 1.1184091447  
H, 0, -0.7237210443, -3.6098578572, 0.8457761879

H, 0, -5.5396932325, -2.1041009178, 0.7457764222  
H, 0, -5.5109736602, 2.2383254341, -0.9673673431  
H, 0, -7.7146686753, 3.3852160416, -1.1541668018  
H, 0, -9.5911923712, 0.0619161711, 0.8046667633  
H, 0, -7.4341221463, -1.0628857072, 1.0021888476  
H, 0, -10.686195262, 1.9637287688, 0.0445942362

## H-pipN2-II

C,0,-8.2855858018,-2.1966413598,2.0372059601  
N,0,-8.0812031821,-1.1592787853,0.974182842  
C,0,-7.5642447091,0.1531718418,1.5371158116  
C,0,-7.4188392795,1.1795259776,0.4057966432  
N,0,-6.5503327125,0.7091733684,-0.6598543238  
C,0,-7.0172780514,-0.5484858588,-1.2034692176  
C,0,-7.1846119208,-1.6538481958,-0.1479746982  
C,0,-5.1387731428,0.9521092956,-0.5373527885  
C,0,-4.1978373141,-0.0744605818,-0.6182083976  
C,0,-2.8389966778,0.2529231773,-0.5387173059  
C,0,-2.4419657274,1.5956359777,-0.3544548994  
C,0,-3.3704525724,2.6285142382,-0.2740395187  
C,0,-4.7156115354,2.2916999683,-0.380039705  
N,0,-1.0630327239,1.5415241748,-0.302996531  
C,0,-0.6905682282,0.2169317851,-0.4619493032  
N,0,-1.7419610642,-0.5722150388,-0.598649605  
C,0,0.7013006757,-0.2256148726,-0.4747542827  
C,0,1.7404025178,0.6168330329,-0.049125577  
C,0,3.0322414641,0.1133362335,-0.1070153093  
C,0,3.3217893759,-1.1952930046,-0.5670600495  
C,0,2.2753236746,-2.0287669076,-0.9796618158  
C,0,0.9827966928,-1.5370635045,-0.9283114123  
N,0,4.2647711107,0.6404470518,0.2285389061  
C,0,5.2181541046,-0.3275416146,-0.0424683624  
N,0,4.6748427594,-1.4319197911,-0.5151839162  
C,0,6.6484048548,-0.1281687808,0.1762209798  
C,0,7.5503739906,-1.1057247513,-0.2803809087  
C,0,8.9138857198,-0.9583710273,-0.0993788549  
C,0,9.4135464329,0.1764375984,0.548584035  
C,0,8.5327835813,1.1562908913,1.0132935164  
C,0,7.164164542,0.9995581122,0.8278188339  
O,0,10.7629434237,0.266031075,0.6962345177  
H,0,-8.6935907708,-3.097026108,1.5796316074  
H,0,-7.3235157991,-2.4157674954,2.4972394553  
H,0,-8.9761733103,-1.8072269993,2.7841253856  
H,0,-8.9963509393,-0.9610273641,0.5571690567  
H,0,-6.6007360802,-0.0654812221,2.000657425  
H,0,-8.2722137019,0.4770397839,2.3023360486  
H,0,-7.0305126636,2.101244656,0.8349605396  
H,0,-8.4104786501,1.4115964791,-0.0069061661  
H,0,-6.3361549376,-0.9016799448,-1.9774673109  
H,0,-7.9877369075,-0.3797858849,-1.691753526  
H,0,-6.2382590565,-1.9246797796,0.3198409239  
H,0,-7.6521689704,-2.5483020161,-0.5639962907  
H,0,-4.4643395448,-1.1138349051,-0.7592717034  
H,0,-3.0736669575,3.6646226364,-0.1617307659  
H,0,-5.4540780825,3.0843523082,-0.3835285297  
H,0,-0.4381139232,2.3305771406,-0.2756328895  
H,0,1.5500225321,1.6116737351,0.3385079849  
H,0,2.4830643887,-3.0317803542,-1.3313712801  
H,0,0.1502590042,-2.1522106111,-1.2427438833  
H,0,4.4455663141,1.5787606344,0.5446447197  
H,0,7.1562089625,-1.9808430548,-0.7807011113

H, 0, 9.6102419944, -1.7088677225, -0.4524471368  
H, 0, 8.9144778736, 2.0349091737, 1.523691405  
H, 0, 6.5073301312, 1.7703878375, 1.2164448817  
H, 0, 10.9990458172, 1.0805163519, 1.1533608975

## H-pipN5-I

C,0,-9.9891425101,-2.1992435842,-0.0862422279  
N,0,-8.7765170897,-1.3821718261,-0.0253349279  
C,0,-7.9294252465,-1.7179488679,1.1086999713  
C,0,-6.7924552494,-0.7146603224,1.2473298279  
N,0,-5.9784952564,-0.6715155868,-0.0353411392  
C,0,-6.8817672203,-0.3982511421,-1.2265990202  
C,0,-8.0148230067,-1.4145021072,-1.2643827525  
C,0,-4.7862620782,0.2144882374,0.0344238319  
C,0,-3.5424625664,-0.3892584341,-0.0906077965  
C,0,-2.4208768594,0.4409404051,-0.0262315233  
C,0,-2.5933193365,1.838918201,0.157077758  
C,0,-3.8466907573,2.4281432057,0.2814615906  
C,0,-4.960257894,1.5922977665,0.2181746959  
N,0,-1.3118921366,2.3358575322,0.1682861513  
C,0,-0.4407974901,1.2678357994,0.0027127761  
N,0,-1.0932130336,0.1241622447,-0.1171229598  
C,0,1.0098316277,1.416467725,-0.0259950277  
C,0,1.7951364819,0.2562495345,0.0088568504  
C,0,3.1789311968,0.3938159072,-0.0107212981  
C,0,3.7625317288,1.684866732,-0.0701301737  
C,0,2.9958135165,2.8477728038,-0.1122135597  
C,0,1.6167253672,2.6943445437,-0.0889977564  
N,0,4.1618135201,-0.5730127037,0.0206512637  
C,0,5.3057444815,0.0748319594,-0.018339943  
N,0,5.1169516199,1.4512317447,-0.0763743755  
C,0,6.6259320229,-0.5497849816,-0.0030965115  
C,0,6.7199561783,-1.9392211639,0.1921331645  
C,0,7.9484366161,-2.5742295235,0.2160142707  
C,0,9.1217591699,-1.8317276162,0.0423982771  
C,0,9.0479311001,-0.4507748643,-0.1567151133  
C,0,7.8092484074,0.1788828269,-0.1795584717  
O,0,10.2985841724,-2.5114068394,0.076418242  
H,0,-10.6168287862,-1.8566285164,-0.9103571149  
H,0,-10.553954398,-2.0805037463,0.8397364611  
H,0,-9.7747998961,-3.2704537228,-0.2309614021  
H,0,-8.5193525881,-1.6832905798,2.0274088601  
H,0,-7.5154441361,-2.7438651236,1.032833376  
H,0,-6.1039039346,-0.9780232817,2.0501201277  
H,0,-7.1735112988,0.2916731848,1.4115111161  
H,0,-5.6097669407,-1.6175053228,-0.1696399329  
H,0,-6.2542587737,-0.4450809329,-2.1165222581  
H,0,-7.2643003204,0.6135599447,-1.1050042345  
H,0,-8.6680322151,-1.1556840064,-2.1007883681  
H,0,-7.6056155222,-2.422716073,-1.4781655228  
H,0,-3.4209553492,-1.4585954144,-0.232464987  
H,0,-3.9721636867,3.4945943748,0.4220928575  
H,0,-5.9489527002,2.0233292368,0.3117679418  
H,0,-1.046761576,3.2947232245,0.3274052371  
H,0,1.33076079,-0.7196100798,0.0538631006  
H,0,3.4438129146,3.8324779569,-0.1681197075  
H,0,1.0085784031,3.5900296355,-0.1447251476  
H,0,5.8400310687,2.1520905377,-0.0795955738  
H,0,5.8082311347,-2.5071039762,0.3254928465



H, 0, 8.023748308, -3.6437704692, 0.3682387032  
H, 0, 9.9542338266, 0.1293051184, -0.2983310548  
H, 0, 7.7883703548, 1.2497487125, -0.3505411149  
H, 0, 11.0405343134, -1.9105197674, -0.0533050672

## H-pipN5-II

C, 0, -10.318626232, -1.0078048622, -0.2979626645  
N, 0, -8.8765903828, -0.7686303902, -0.2221524897  
C, 0, -8.3802873883, 0.0277266367, -1.333899299  
C, 0, -6.8586224662, 0.0770137646, -1.3236497503  
N, 0, -6.3644573032, 0.6386835612, -0.0001979333  
C, 0, -6.9518299971, -0.1483233928, 1.1602647854  
C, 0, -8.4696713994, -0.1882019676, 1.0482746558  
C, 0, -4.8914882267, 0.8159355875, 0.0710530529  
C, 0, -4.0583157915, -0.2996958499, 0.0027271518  
C, 0, -2.6959651552, -0.0359852402, 0.0764478902  
C, 0, -2.1750477575, 1.2818854583, 0.2114960194  
C, 0, -3.0464666847, 2.3705224561, 0.2784567368  
C, 0, -4.4134110197, 2.1244812018, 0.206364882  
N, 0, -0.8068397985, 1.250284059, 0.2574743245  
C, 0, -0.4659657277, -0.0202890032, 0.1571767103  
N, 0, -1.5833958111, -0.8417709237, 0.048282339  
C, 0, 0.9006022409, -0.5293057762, 0.1523944243  
C, 0, 1.9493335124, 0.3959650354, 0.0603858488  
C, 0, 3.2545789131, -0.083847822, 0.0501909984  
C, 0, 3.4988010991, -1.4784119548, 0.1340895909  
C, 0, 2.4676006042, -2.4105386006, 0.2334941417  
C, 0, 1.1705816616, -1.9165453009, 0.2415243839  
N, 0, 4.4461542758, 0.6047408051, -0.0339661821  
C, 0, 5.3927758149, -0.307606115, -0.0035516648  
N, 0, 4.8679094746, -1.591723231, 0.0961695763  
C, 0, 6.8258678024, -0.0328289538, -0.0643608589  
C, 0, 7.2634481678, 1.3036749241, -0.0562915954  
C, 0, 8.6103597839, 1.6130735301, -0.1100465701  
C, 0, 9.5602984698, 0.5876359633, -0.1751781207  
C, 0, 9.1443591316, -0.7461755591, -0.187378894  
C, 0, 7.7888654694, -1.0478400573, -0.1332139856  
O, 0, 10.8684116603, 0.9539537058, -0.225310162  
H, 0, -10.6208885307, -1.6660286958, 0.5180490705  
H, 0, -10.5549031649, -1.5068722299, -1.2390269564  
H, 0, -10.9087373192, -0.0792872566, -0.2360259979  
H, 0, -8.6936482526, -0.4265721546, -2.2765925123  
H, 0, -8.787629915, 1.0589912569, -1.325059122  
H, 0, -6.4597908514, 0.7197675574, -2.1082843405  
H, 0, -6.4325693208, -0.920175039, -1.419650723  
H, 0, -6.755988352, 1.5823607811, 0.070746945  
H, 0, -6.6167308721, 0.3401976893, 2.0750921078  
H, 0, -6.5275507306, -1.1494551799, 1.1069335835  
H, 0, -8.8493069507, -0.8021831605, 1.8681224984  
H, 0, -8.882009622, 0.83069145, 1.1944325506  
H, 0, -4.4419090375, -1.3074653751, -0.1003046746  
H, 0, -2.6622842931, 3.3770059943, 0.3828052075  
H, 0, -5.1096899326, 2.9565752665, 0.25541414  
H, 0, -1.5689223241, -1.8393288402, -0.0903425863  
H, 0, 1.7417445306, 1.4556443046, -0.0033321813  
H, 0, 2.6571029529, -3.4744374652, 0.3092420259  
H, 0, 0.3600080132, -2.6294531073, 0.3427802023  
H, 0, 5.3947664924, -2.4471756028, 0.1639589481  
H, 0, 6.5230537372, 2.0915502962, -0.0055972551

H, 0, 8.9499418834, 2.6413539632, -0.1020839145  
H, 0, 9.8764549706, -1.5454836985, -0.2428385498  
H, 0, 7.5015864534, -2.0935119708, -0.1558258053  
H, 0, 11.4363544952, 0.1767825285, -0.2672700029

Ground State (S<sub>0</sub>) of 2+ Charge State at B3LYP/6-31G(d)

H-bz1-bz2-a

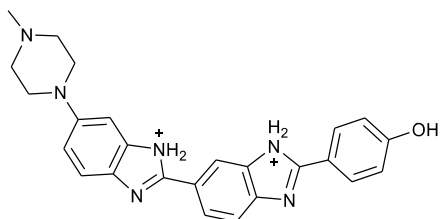

|   |   |           |          |          |
|---|---|-----------|----------|----------|
| C | 0 | 10.51402  | 0.62931  | 0.73227  |
| N | 0 | 9.24158   | 0.26889  | 0.11041  |
| C | 0 | 8.66592   | -0.93859 | 0.67842  |
| C | 0 | 7.43691   | -1.38708 | -0.11815 |
| N | 0 | 6.4403    | -0.30228 | -0.2172  |
| C | 0 | 7.03416   | 0.97593  | -0.65778 |
| C | 0 | 8.2664    | 1.34407  | 0.16867  |
| C | 0 | 5.10201   | -0.54571 | -0.22781 |
| C | 0 | 4.14899   | 0.53362  | -0.21494 |
| C | 0 | 2.82597   | 0.19294  | -0.18222 |
| C | 0 | 2.31169   | -1.11214 | -0.17128 |
| C | 0 | 3.2266    | -2.17145 | -0.20313 |
| C | 0 | 4.57834   | -1.883   | -0.23592 |
| N | 0 | 0.93052   | -1.12551 | -0.14113 |
| C | 0 | 0.46597   | 0.07057  | -0.12723 |
| N | 0 | 1.64246   | 1.09306  | -0.15231 |
| C | 0 | -0.90352  | 0.53011  | -0.08886 |
| C | 0 | -1.92037  | -0.46366 | -0.0625  |
| C | 0 | -3.21349  | -0.01092 | -0.02754 |
| C | 0 | -3.58715  | 1.34461  | -0.01597 |
| C | 0 | -2.59072  | 2.31853  | -0.04156 |
| C | 0 | -1.26267  | 1.89622  | -0.07804 |
| N | 0 | -4.47118  | -0.78154 | 0.00514  |
| C | 0 | -5.55713  | 0.37939  | 0.03534  |
| N | 0 | -4.96489  | 1.51602  | 0.02091  |
| C | 0 | -6.93817  | 0.02436  | 0.07157  |
| C | 0 | -7.89328  | 1.07723  | 0.09772  |
| C | 0 | -9.24066  | 0.80036  | 0.13307  |
| C | 0 | -9.68556  | -0.5393  | 0.14366  |
| C | 0 | -8.75045  | -1.59517 | 0.11805  |
| C | 0 | -7.39808  | -1.31263 | 0.08257  |
| O | 0 | -11.00687 | -0.73096 | 0.17837  |
| H | 0 | 10.92575  | 1.51148  | 0.23296  |
| H | 0 | 11.22473  | -0.19305 | 0.60833  |
| H | 0 | 10.421    | 0.85001  | 1.81088  |
| H | 0 | 9.4038    | -1.74656 | 0.63482  |
| H | 0 | 8.3802    | -0.80724 | 1.74145  |
| H | 0 | 7.73871   | -1.69497 | -1.12836 |
| H | 0 | 6.9971    | -2.2412  | 0.39532  |
| H | 0 | 6.30475   | 1.78135  | -0.59062 |
| H | 0 | 7.32676   | 0.86819  | -1.71121 |
| H | 0 | 7.95768   | 1.58063  | 1.20729  |

|   |   |           |          |          |
|---|---|-----------|----------|----------|
| H | 0 | 8.70298   | 2.25221  | -0.2608  |
| H | 0 | 4.465     | 1.56803  | -0.19983 |
| H | 0 | 2.88068   | -3.19929 | -0.22162 |
| H | 0 | 5.26257   | -2.71693 | -0.30213 |
| H | 0 | 1.59408   | 1.70088  | -0.98012 |
| H | 0 | 1.63041   | 1.69933  | 0.67818  |
| H | 0 | -1.64739  | -1.5136  | -0.07082 |
| H | 0 | -2.84871  | 3.37148  | -0.03363 |
| H | 0 | -0.49507  | 2.6652   | -0.09875 |
| H | 0 | -4.55529  | -1.38029 | 0.83642  |
| H | 0 | -4.59944  | -1.37847 | -0.82181 |
| H | 0 | -7.54594  | 2.10457  | 0.08941  |
| H | 0 | -9.9796   | 1.59398  | 0.15324  |
| H | 0 | -9.09232  | -2.62641 | 0.12618  |
| H | 0 | -6.70615  | -2.15176 | 0.06356  |
| H | 0 | -11.23734 | -1.67603 | 0.18352  |

H-bz1-bz2-b

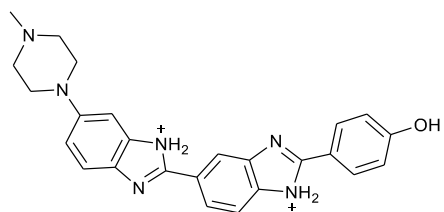

|   |   |           |          |          |
|---|---|-----------|----------|----------|
| C | 0 | 9.71622   | 2.63529  | 0.58597  |
| N | 0 | 8.64842   | 1.82477  | 0.00421  |
| C | 0 | 8.52899   | 0.5225   | 0.63846  |
| C | 0 | 7.53184   | -0.36424 | -0.11334 |
| N | 0 | 6.21963   | 0.30057  | -0.2439  |
| C | 0 | 6.33241   | 1.6809   | -0.75612 |
| C | 0 | 7.36028   | 2.49563  | 0.02943  |
| C | 0 | 5.04907   | -0.39049 | -0.21119 |
| C | 0 | 3.78061   | 0.29213  | -0.23259 |
| C | 0 | 2.658     | -0.48246 | -0.15202 |
| C | 0 | 2.63008   | -1.88255 | -0.0618  |
| C | 0 | 3.85523   | -2.56093 | -0.05997 |
| C | 0 | 5.02228   | -1.82502 | -0.13847 |
| N | 0 | 1.34193   | -2.37217 | 0.00046  |
| C | 0 | 0.48848   | -1.41672 | -0.03686 |
| N | 0 | 1.2354    | -0.04985 | -0.14179 |
| C | 0 | -0.96006  | -1.46519 | 0.00915  |
| C | 0 | -1.76128  | -0.30505 | -0.04482 |
| C | 0 | -3.14248  | -0.45789 | 0.00483  |
| C | 0 | -3.69617  | -1.7384  | 0.10514  |
| C | 0 | -2.94383  | -2.89766 | 0.16027  |
| C | 0 | -1.5577   | -2.74546 | 0.11092  |
| N | 0 | -4.1158   | 0.54298  | -0.03419 |
| C | 0 | -5.28434  | 0.02143  | 0.03294  |
| N | 0 | -5.15737  | -1.55384 | 0.13385  |
| C | 0 | -6.58944  | 0.60241  | 0.03055  |
| C | 0 | -6.68932  | 2.01661  | -0.06145 |
| C | 0 | -7.91927  | 2.63424  | -0.06841 |
| C | 0 | -9.09726  | 1.86127  | 0.0164   |
| C | 0 | -9.01506  | 0.45655  | 0.10825  |
| C | 0 | -7.77737  | -0.15901 | 0.11484  |
| O | 0 | -10.25391 | 2.52947  | 0.00398  |
| H | 0 | 9.79531   | 3.57945  | 0.03879  |
| H | 0 | 10.66852  | 2.10589  | 0.48806  |
| H | 0 | 9.55261   | 2.86348  | 1.65459  |
| H | 0 | 9.50165   | 0.01983  | 0.619    |
| H | 0 | 8.21664   | 0.59971  | 1.69927  |
| H | 0 | 7.91978   | -0.59772 | -1.11393 |
| H | 0 | 7.41795   | -1.29125 | 0.44695  |
| H | 0 | 5.36871   | 2.18563  | -0.71522 |
| H | 0 | 6.64442   | 1.62687  | -1.80805 |
| H | 0 | 6.98911   | 2.66243  | 1.06119  |
| H | 0 | 7.45339   | 3.47591  | -0.45036 |
| H | 0 | 3.71895   | 1.37103  | -0.27869 |
| H | 0 | 3.88546   | -3.64434 | -0.01757 |

|   |   |           |          |          |
|---|---|-----------|----------|----------|
| H | 0 | 5.95306   | -2.37276 | -0.1774  |
| H | 0 | 0.97521   | 0.45493  | -0.99877 |
| H | 0 | 1.01525   | 0.55967  | 0.65653  |
| H | 0 | -1.35309  | 0.69747  | -0.1238  |
| H | 0 | -3.38532  | -3.88629 | 0.23817  |
| H | 0 | -0.91759  | -3.61901 | 0.15054  |
| H | 0 | -5.5914   | -1.89947 | 0.99998  |
| H | 0 | -5.63768  | -2.00913 | -0.65358 |
| H | 0 | -5.78152  | 2.60627  | -0.12646 |
| H | 0 | -8.00934  | 3.71278  | -0.13824 |
| H | 0 | -9.92083  | -0.13984 | 0.17361  |
| H | 0 | -7.75368  | -1.24406 | 0.18695  |
| H | 0 | -11.01931 | 1.93221  | 0.06534  |

### H-bz1-bz2-c

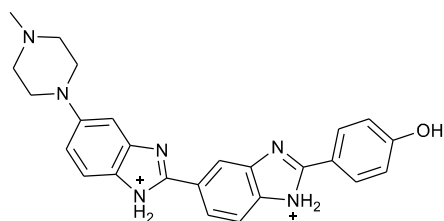

C,0,18.2131731077,4.3661312266,-0.6872929029  
N,0,17.1074265927,3.5031746914,-0.2781398616  
C,0,15.8110793401,4.0711849254,-0.6057518019  
C,0,14.686066819,3.2436912192,0.0139571899  
N,0,14.7786401787,1.8127734727,-0.3381806591  
C,0,16.14009198,1.2458719516,-0.2700137896  
C,0,17.1906805026,2.1790245222,-0.8706700387  
C,0,13.68300101,1.0017353344,-0.2385217965  
C,0,12.3646708548,1.540528124,-0.0981015065  
C,0,11.2914061711,0.6728176087,-0.0643482304  
C,0,11.4541956213,-0.713872185,-0.1432137043  
C,0,12.7063905408,-1.2898321302,-0.2381883592  
C,0,13.8000308606,-0.426881515,-0.2742941706  
N,0,10.1043077666,-1.3083929159,-0.0652302549  
C,0,9.2179096741,-0.0387641929,0.0667863721  
N,0,9.9326385183,1.0131457883,0.0620187512  
C,0,7.7661483227,-0.1610983748,0.1745372952  
C,0,7.1136437576,-1.4087790735,0.1643828675  
C,0,5.7261256712,-1.4233845336,0.2727884316  
C,0,5.0305975408,-0.2145422832,0.3873185438  
C,0,5.6376404522,1.0265852295,0.4007824807  
C,0,7.0307967726,1.0396051099,0.2915706234  
N,0,4.8807346026,-2.5319638557,0.2844384714  
C,0,3.6607344545,-2.1540702422,0.3990933205  
N,0,3.6038734687,-0.5705231533,0.4820773315  
C,0,2.4372951689,-2.8850344111,0.4588325863  
C,0,2.5048920702,-4.3030336809,0.3822824726  
C,0,1.3595046186,-5.0634239153,0.4342780305  
C,0,0.1013831796,-4.4358125555,0.5649240155  
C,0,0.017335408,-3.0294637834,0.6422470978  
C,0,1.170347838,-2.2700699721,0.5895539641  
O,0,-0.9646393773,-5.2374686537,0.6085845726  
H,0,19.1609935208,3.9117776052,-0.383495122  
H,0,18.1243215085,5.3343232013,-0.1853339247  
H,0,18.2445048679,4.5406904706,-1.7781343184  
H,0,15.742119737,5.084642247,-0.1962771494  
H,0,15.6544149781,4.1444691841,-1.7010085677  
H,0,14.7099239515,3.3500627194,1.107942803  
H,0,13.7423339509,3.647996705,-0.3540431715  
H,0,16.171278809,0.3146473499,-0.8374326066  
H,0,16.3931961178,1.0275971959,0.7774065689  
H,0,17.0682905068,2.2096483843,-1.9721633449  
H,0,18.1751219305,1.7467386856,-0.6627125516  
H,0,12.1738355922,2.6001628046,-0.0142446041  
H,0,12.8663097657,-2.3630404917,-0.273848732



H,0,14.7766795513,-0.8856210649,-0.3216327962  
H,0,9.9812639842,-1.9303972872,0.7465052978  
H,0,9.8512253805,-1.8494255247,-0.9043361111  
H,0,7.6366454186,-2.3555439097,0.0765007592  
H,0,5.0839353116,1.9559219414,0.4902745632  
H,0,7.5644344577,1.9828691837,0.2959550859  
H,0,3.0406789213,-0.1843863497,-0.2871960684  
H,0,3.170822797,-0.2662224994,1.3640918657  
H,0,3.4734139488,-4.7804566023,0.2819802176  
H,0,1.3967955929,-6.1458136186,0.3769147592  
H,0,-0.9502073178,-2.5456846211,0.7428231152  
H,0,1.0663038197,-1.1891597932,0.6521157058  
H,0,-1.79437159,-4.7374386921,0.6990619849

H-bz1-bz2-d

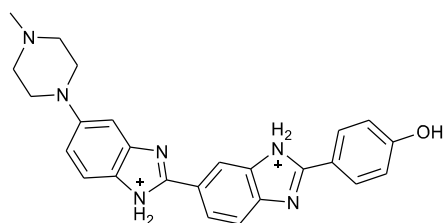

|   |   |           |          |          |
|---|---|-----------|----------|----------|
| C | 0 | -9.65374  | 2.84404  | 0.09786  |
| N | 0 | -8.49646  | 2.01494  | -0.23101 |
| C | 0 | -7.24826  | 2.59983  | 0.22706  |
| C | 0 | -6.05347  | 1.81237  | -0.30856 |
| N | 0 | -6.14499  | 0.37109  | -0.00385 |
| C | 0 | -7.48192  | -0.22151 | -0.20731 |
| C | 0 | -8.60285  | 0.67389  | 0.31869  |
| C | 0 | -5.02644  | -0.41524 | -0.03506 |
| C | 0 | -3.71334  | 0.15334  | -0.04927 |
| C | 0 | -2.6209   | -0.69072 | -0.01854 |
| C | 0 | -2.76169  | -2.08149 | 0.00619  |
| C | 0 | -4.00418  | -2.68501 | -0.02001 |
| C | 0 | -5.11594  | -1.84579 | -0.05005 |
| N | 0 | -1.39829  | -2.65013 | 0.0234   |
| C | 0 | -0.52944  | -1.36362 | 0.00282  |
| N | 0 | -1.2626   | -0.32187 | -0.02128 |
| C | 0 | 0.92107   | -1.4611  | 0.01305  |
| C | 0 | 1.64992   | -0.24312 | -0.0052  |
| C | 0 | 3.01669   | -0.35278 | 0.00384  |
| C | 0 | 3.71905   | -1.57117 | 0.02973  |
| C | 0 | 3.00168   | -2.76609 | 0.04782  |
| C | 0 | 1.60928   | -2.69174 | 0.03906  |
| N | 0 | 4.04058   | 0.70884  | -0.01016 |
| C | 0 | 5.3837    | -0.14262 | 0.01227  |
| N | 0 | 5.09495   | -1.39257 | 0.03362  |
| C | 0 | 6.63115   | 0.54409  | 0.00611  |
| C | 0 | 7.8187    | -0.23957 | 0.0266   |
| C | 0 | 9.05514   | 0.36257  | 0.02189  |
| C | 0 | 9.15351   | 1.77127  | -0.00348 |
| C | 0 | 7.98465   | 2.56301  | -0.02402 |
| C | 0 | 6.74506   | 1.95438  | -0.0192  |
| O | 0 | 10.38479  | 2.28394  | -0.00657 |
| H | 0 | -10.55994 | 2.37877  | -0.30137 |
| H | 0 | -9.54228  | 3.82693  | -0.36994 |
| H | 0 | -9.7868   | 2.98871  | 1.18542  |
| H | 0 | -7.16575  | 3.62538  | -0.14861 |
| H | 0 | -7.19272  | 2.64636  | 1.33359  |
| H | 0 | -5.97976  | 1.94987  | -1.397   |
| H | 0 | -5.15643  | 2.22478  | 0.15531  |
| H | 0 | -7.54221  | -1.1673  | 0.33308  |
| H | 0 | -7.63592  | -0.41852 | -1.27798 |
| H | 0 | -8.5807   | 0.67803  | 1.4271   |
| H | 0 | -9.55469  | 0.22761  | 0.01209  |
| H | 0 | -3.54164  | 1.21888  | -0.08625 |
| H | 0 | -4.14184  | -3.76188 | -0.02866 |

|   |   |          |          |          |
|---|---|----------|----------|----------|
| H | 0 | -6.08291 | -2.32454 | -0.09699 |
| H | 0 | -1.19743 | -3.24512 | -0.79302 |
| H | 0 | -1.20571 | -3.21286 | 0.86426  |
| H | 0 | 1.11829  | 0.70249  | -0.02512 |
| H | 0 | 3.51773  | -3.71924 | 0.06792  |
| H | 0 | 1.05982  | -3.62902 | 0.05312  |
| H | 0 | 3.98907  | 1.32919  | 0.80813  |
| H | 0 | 3.99761  | 1.29907  | -0.85091 |
| H | 0 | 7.73673  | -1.32078 | 0.04604  |
| H | 0 | 9.96838  | -0.22228 | 0.03731  |
| H | 0 | 8.06092  | 3.64657  | -0.04354 |
| H | 0 | 5.86633  | 2.59525  | -0.03548 |
| H | 0 | 10.37656 | 3.25677  | -0.02452 |

# H-pip1-bz1-aI

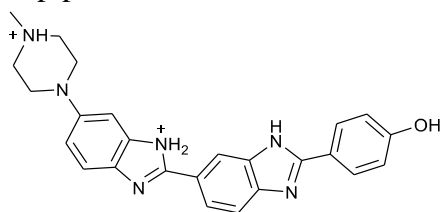

|   |   |           |          |          |
|---|---|-----------|----------|----------|
| C | 0 | -9.85251  | -2.55437 | 0.23575  |
| N | 0 | -8.78384  | -1.55793 | -0.12958 |
| C | 0 | -8.40801  | -0.65952 | 1.03436  |
| C | 0 | -7.34018  | 0.34521  | 0.60894  |
| N | 0 | -6.16274  | -0.35594 | 0.10966  |
| C | 0 | -6.49571  | -1.1715  | -1.06054 |
| C | 0 | -7.54467  | -2.22113 | -0.7007  |
| C | 0 | -4.94532  | 0.39194  | 0.02984  |
| C | 0 | -3.72378  | -0.31837 | 0.04847  |
| C | 0 | -2.56811  | 0.43124  | -0.00789 |
| C | 0 | -2.53408  | 1.83264  | -0.05688 |
| C | 0 | -3.73963  | 2.52971  | -0.06184 |
| C | 0 | -4.92865  | 1.79764  | -0.02872 |
| N | 0 | -1.24032  | 2.33916  | -0.08351 |
| C | 0 | -0.38321  | 1.38537  | -0.04846 |
| N | 0 | -1.1628   | -0.01287 | 0.00926  |
| C | 0 | 1.03899   | 1.3653   | -0.04847 |
| C | 0 | 1.793     | 0.16168  | -0.00305 |
| C | 0 | 3.16705   | 0.28198  | -0.00647 |
| C | 0 | 3.83044   | 1.55268  | -0.05399 |
| C | 0 | 3.06929   | 2.73708  | -0.09928 |
| C | 0 | 1.69549   | 2.63548  | -0.09596 |
| N | 0 | 4.19958   | -0.63187 | 0.02893  |
| C | 0 | 5.39095   | 0.07589  | 0.0035   |
| N | 0 | 5.17554   | 1.39304  | -0.04673 |
| C | 0 | 6.69873   | -0.53991 | 0.02862  |
| C | 0 | 6.88619   | -1.93799 | 0.08079  |
| C | 0 | 8.1548    | -2.48616 | 0.10367  |
| C | 0 | 9.28005   | -1.64206 | 0.0747   |
| C | 0 | 9.11129   | -0.24796 | 0.02261  |
| C | 0 | 7.83712   | 0.29265  | -0.00002 |
| O | 0 | 10.48771  | -2.23885 | 0.09932  |
| H | 0 | -10.10734 | -3.13847 | -0.65    |
| H | 0 | -9.46536  | -3.20686 | 1.01959  |
| H | 0 | -10.7294  | -2.01359 | 0.5952   |
| H | 0 | -9.16936  | -0.9526  | -0.86576 |
| H | 0 | -8.04239  | -1.31718 | 1.82639  |
| H | 0 | -9.31963  | -0.15757 | 1.36771  |
| H | 0 | -7.07129  | 0.93281  | 1.49093  |
| H | 0 | -7.77199  | 1.04396  | -0.13258 |
| H | 0 | -5.60745  | -1.69977 | -1.41478 |
| H | 0 | -6.85631  | -0.55246 | -1.90382 |
| H | 0 | -7.17851  | -2.90084 | 0.07251  |
| H | 0 | -7.85485  | -2.79637 | -1.57655 |
| H | 0 | -3.7165   | -1.40072 | 0.13439  |

|   |   |          |          |          |
|---|---|----------|----------|----------|
| H | 0 | -3.74772 | 3.61325  | -0.1015  |
| H | 0 | -5.86317 | 2.34735  | -0.05241 |
| H | 0 | -0.90864 | -0.59648 | -0.7963  |
| H | 0 | -0.90793 | -0.52709 | 0.86087  |
| H | 0 | 1.3241   | -0.81922 | 0.03361  |
| H | 0 | 3.56514  | 3.70089  | -0.13521 |
| H | 0 | 1.0796   | 3.52697  | -0.12939 |
| H | 0 | 4.11163  | -1.63642 | 0.06833  |
| H | 0 | 6.03693  | -2.61648 | 0.10403  |
| H | 0 | 8.30812  | -3.55902 | 0.14371  |
| H | 0 | 9.98042  | 0.40498  | 0.00016  |
| H | 0 | 7.69769  | 1.36713  | -0.04011 |
| H | 0 | 11.19752 | -1.57576 | 0.07624  |

# H-pip1-bz1-aII

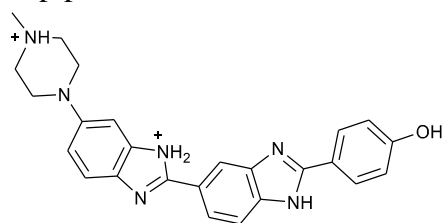

|   |   |           |          |          |
|---|---|-----------|----------|----------|
| C | 0 | 10.56014  | 0.65241  | 0.22969  |
| N | 0 | 9.22242   | 0.08548  | -0.16815 |
| C | 0 | 8.58854   | -0.7336  | 0.94073  |
| C | 0 | 7.24698   | -1.30341 | 0.48571  |
| N | 0 | 6.35541   | -0.2234  | 0.07834  |
| C | 0 | 6.92284   | 0.5322   | -1.04103 |
| C | 0 | 8.25891   | 1.15573  | -0.64454 |
| C | 0 | 4.96      | -0.52107 | -0.0002  |
| C | 0 | 4.0428    | 0.55216  | 0.07629  |
| C | 0 | 2.7037    | 0.23001  | 0.02303  |
| C | 0 | 2.20792   | -1.07715 | -0.07667 |
| C | 0 | 3.1115    | -2.13296 | -0.13874 |
| C | 0 | 4.47719   | -1.83805 | -0.10979 |
| N | 0 | 0.81492   | -1.12306 | -0.08841 |
| C | 0 | 0.3267    | 0.05459  | 0.0037   |
| N | 0 | 1.52653   | 1.112    | 0.09299  |
| C | 0 | -1.01231  | 0.55157  | 0.04191  |
| C | 0 | -2.05511  | -0.40424 | -0.03195 |
| C | 0 | -3.3639   | 0.0518   | 0.00431  |
| C | 0 | -3.62536  | 1.45352  | 0.1139   |
| C | 0 | -2.60487  | 2.40869  | 0.18757  |
| C | 0 | -1.30075  | 1.94252  | 0.15024  |
| N | 0 | -4.54051  | -0.65404 | -0.04947 |
| C | 0 | -5.50423  | 0.24617  | 0.02186  |
| N | 0 | -4.98441  | 1.54422  | 0.12236  |
| C | 0 | -6.92791  | -0.03617 | 0.00194  |
| C | 0 | -7.90737  | 0.97452  | 0.07949  |
| C | 0 | -9.25617  | 0.66478  | 0.05774  |
| C | 0 | -9.66174  | -0.67625 | -0.04309 |
| C | 0 | -8.69814  | -1.69514 | -0.12134 |
| C | 0 | -7.3501   | -1.37583 | -0.09888 |
| O | 0 | -10.99068 | -0.91356 | -0.05937 |
| H | 0 | 10.9806   | 1.19253  | -0.6201  |
| H | 0 | 10.41346  | 1.32963  | 1.07225  |
| H | 0 | 11.21865  | -0.16884 | 0.51691  |
| H | 0 | 9.38369   | -0.55067 | -0.95956 |
| H | 0 | 8.46567   | -0.05894 | 1.79119  |
| H | 0 | 9.29132   | -1.52806 | 1.20352  |
| H | 0 | 6.81342   | -1.83704 | 1.33581  |
| H | 0 | 7.41746   | -2.04568 | -0.31691 |
| H | 0 | 6.25093   | 1.34495  | -1.32581 |
| H | 0 | 7.05448   | -0.10189 | -1.93801 |
| H | 0 | 8.14107   | 1.8535   | 0.18803  |
| H | 0 | 8.72864   | 1.66839  | -1.4876  |
| H | 0 | 4.39361   | 1.57166  | 0.20356  |

|   |   |           |          |          |
|---|---|-----------|----------|----------|
| H | 0 | 2.75912   | -3.15526 | -0.21925 |
| H | 0 | 5.17535   | -2.66474 | -0.17973 |
| H | 0 | 1.4683    | 1.782    | -0.68301 |
| H | 0 | 1.46448   | 1.64442  | 0.96915  |
| H | 0 | -1.83257  | -1.46182 | -0.11393 |
| H | 0 | -2.8146   | 3.47007  | 0.27057  |
| H | 0 | -0.50134  | 2.67725  | 0.20701  |
| H | 0 | -5.52399  | 2.39571  | 0.19043  |
| H | 0 | -7.62881  | 2.02248  | 0.15802  |
| H | 0 | -10.01438 | 1.43795  | 0.11701  |
| H | 0 | -9.01013  | -2.73397 | -0.19944 |
| H | 0 | -6.60115  | -2.15779 | -0.15882 |
| H | 0 | -11.16411 | -1.86645 | -0.13125 |

# H-pip1-bz1-bl

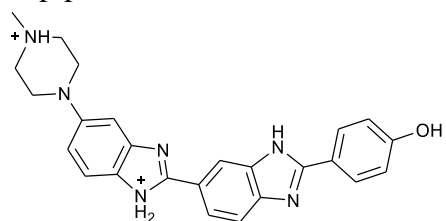

|   |   |           |          |          |
|---|---|-----------|----------|----------|
| C | 0 | 10.542    | -0.66006 | 0.25671  |
| N | 0 | 9.10684   | -0.58335 | -0.19376 |
| C | 0 | 8.15859   | -1.2524  | 0.78309  |
| C | 0 | 6.71614   | -1.16676 | 0.28652  |
| N | 0 | 6.34124   | 0.22344  | 0.06925  |
| C | 0 | 7.20564   | 0.86106  | -0.924   |
| C | 0 | 8.66031   | 0.84127  | -0.46389 |
| C | 0 | 4.9601    | 0.55876  | 0.05181  |
| C | 0 | 3.96521   | -0.43185 | -0.0303  |
| C | 0 | 2.62909   | -0.03661 | 0.008    |
| C | 0 | 2.30685   | 1.32082  | 0.10554  |
| C | 0 | 3.25757   | 2.32018  | 0.18003  |
| C | 0 | 4.59619   | 1.9195   | 0.161    |
| N | 0 | 0.83702   | 1.39784  | 0.11168  |
| C | 0 | 0.43557   | -0.13569 | -0.00707 |
| N | 0 | 1.50318   | -0.85164 | -0.0596  |
| C | 0 | -0.94576  | -0.47239 | -0.03431 |
| C | 0 | -1.9753   | 0.50502  | 0.04078  |
| C | 0 | -3.2763   | 0.04997  | 0.00554  |
| C | 0 | -3.60508  | -1.34203 | -0.10239 |
| C | 0 | -2.57377  | -2.29945 | -0.17634 |
| C | 0 | -1.26817  | -1.86216 | -0.14185 |
| N | 0 | -4.50259  | 0.67929  | 0.0542   |
| C | 0 | -5.48194  | -0.29776 | -0.02129 |
| N | 0 | -4.94731  | -1.51907 | -0.11617 |
| C | 0 | -6.90096  | -0.0245  | 0.00059  |
| C | 0 | -7.42769  | 1.28148  | 0.10169  |
| C | 0 | -8.79223  | 1.49946  | 0.11988  |
| C | 0 | -9.67443  | 0.40643  | 0.03655  |
| C | 0 | -9.16691  | -0.90018 | -0.06474 |
| C | 0 | -7.79875  | -1.10956 | -0.08221 |
| O | 0 | -10.99179 | 0.68652  | 0.05951  |
| H | 0 | 11.17472  | -0.20064 | -0.50436 |
| H | 0 | 10.63831  | -0.12304 | 1.20139  |
| H | 0 | 10.81362  | -1.70842 | 0.38989  |
| H | 0 | 9.03754   | -1.09522 | -1.08263 |
| H | 0 | 8.27956   | -0.73015 | 1.73508  |
| H | 0 | 8.48113   | -2.29066 | 0.8932   |
| H | 0 | 6.08604   | -1.60185 | 1.06642  |
| H | 0 | 6.59509   | -1.78879 | -0.62023 |
| H | 0 | 6.9179    | 1.9036   | -1.06714 |
| H | 0 | 7.11822   | 0.36864  | -1.91066 |
| H | 0 | 8.79006   | 1.38723  | 0.47369  |
| H | 0 | 9.3275    | 1.25523  | -1.22399 |
| H | 0 | 4.1939    | -1.48467 | -0.13927 |



|   |   |           |          |          |
|---|---|-----------|----------|----------|
| H | 0 | 3.00231   | 3.37133  | 0.27208  |
| H | 0 | 5.3645    | 2.6763   | 0.27361  |
| H | 0 | 0.45342   | 1.93185  | -0.67775 |
| H | 0 | 0.45339   | 1.80282  | 0.97463  |
| H | 0 | -1.76471  | 1.56886  | 0.1232   |
| H | 0 | -2.81611  | -3.35335 | -0.25804 |
| H | 0 | -0.45052  | -2.57181 | -0.19627 |
| H | 0 | -4.66495  | 1.67234  | 0.13284  |
| H | 0 | -6.77223  | 2.14635  | 0.16754  |
| H | 0 | -9.20557  | 2.4991   | 0.19733  |
| H | 0 | -9.84823  | -1.74508 | -0.12918 |
| H | 0 | -7.39845  | -2.11418 | -0.15993 |
| H | 0 | -11.51647 | -0.1289  | -0.00274 |

### H-pip1-bz1-bII

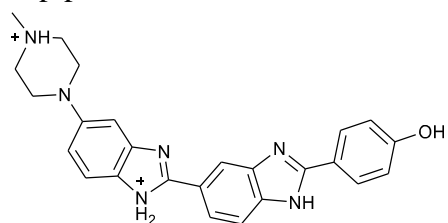

|   |   |           |          |          |
|---|---|-----------|----------|----------|
| C | 0 | -9.76481  | 2.58283  | 0.23748  |
| N | 0 | -8.4301   | 2.04607  | -0.20917 |
| C | 0 | -7.32834  | 2.33176  | 0.79352  |
| C | 0 | -5.98855  | 1.78514  | 0.30219  |
| N | 0 | -6.09434  | 0.35663  | 0.03949  |
| C | 0 | -7.10691  | 0.07331  | -0.97804 |
| C | 0 | -8.47892  | 0.56277  | -0.52394 |
| C | 0 | -4.90647  | -0.42172 | 0.02421  |
| C | 0 | -3.63435  | 0.17936  | -0.00677 |
| C | 0 | -2.51202  | -0.64384 | 0.03142  |
| C | 0 | -2.66286  | -2.03215 | 0.07855  |
| C | 0 | -3.89511  | -2.65648 | 0.10217  |
| C | 0 | -5.02049  | -1.82852 | 0.08363  |
| N | 0 | -1.30466  | -2.59632 | 0.09824  |
| C | 0 | -0.41162  | -1.28363 | 0.04567  |
| N | 0 | -1.17221  | -0.25253 | 0.00923  |
| C | 0 | 1.00939   | -1.43215 | 0.04931  |
| C | 0 | 1.78453   | -0.24705 | 0.00803  |
| C | 0 | 3.16549   | -0.36758 | 0.01115  |
| C | 0 | 3.76484   | -1.66533 | 0.05539  |
| C | 0 | 3.01198   | -2.84478 | 0.09629  |
| C | 0 | 1.63336   | -2.71273 | 0.09265  |
| N | 0 | 4.13254   | 0.60745  | -0.02273 |
| C | 0 | 5.28845   | -0.03098 | -0.00132 |
| N | 0 | 5.10422   | -1.41992 | 0.04637  |
| C | 0 | 6.5998    | 0.59126  | -0.02307 |
| C | 0 | 7.79711   | -0.15223 | 0.00331  |
| C | 0 | 9.02936   | 0.47756  | -0.01849 |
| C | 0 | 9.0946    | 1.8798   | -0.06768 |
| C | 0 | 7.91074   | 2.6352   | -0.09451 |
| C | 0 | 6.68154   | 1.99617  | -0.07237 |
| O | 0 | 10.32536  | 2.43427  | -0.08679 |
| H | 0 | -10.50279 | 2.3826   | -0.54093 |
| H | 0 | -10.04823 | 2.08106  | 1.16375  |
| H | 0 | -9.67434  | 3.65747  | 0.40346  |
| H | 0 | -8.18135  | 2.53181  | -1.08044 |
| H | 0 | -7.63111  | 1.852    | 1.72723  |
| H | 0 | -7.28827  | 3.41441  | 0.93634  |
| H | 0 | -5.2633   | 1.96171  | 1.10056  |
| H | 0 | -5.65175  | 2.35798  | -0.58207 |
| H | 0 | -7.18078  | -1.00057 | -1.1551  |
| H | 0 | -6.84529  | 0.53802  | -1.94703 |
| H | 0 | -8.7973   | 0.06365  | 0.39447  |
| H | 0 | -9.234    | 0.41702  | -1.30039 |
| H | 0 | -3.49336  | 1.25072  | -0.07652 |

|   |   |          |          |          |
|---|---|----------|----------|----------|
| H | 0 | -4.00926 | -3.73469 | 0.15523  |
| H | 0 | -6.00011 | -2.28762 | 0.15652  |
| H | 0 | -1.1007  | -3.20103 | -0.70721 |
| H | 0 | -1.09688 | -3.13574 | 0.94807  |
| H | 0 | 1.30722  | 0.72538  | -0.02473 |
| H | 0 | 3.4774   | -3.82437 | 0.12949  |
| H | 0 | 1.04079  | -3.62352 | 0.12397  |
| H | 0 | 5.83679  | -2.11543 | 0.06968  |
| H | 0 | 7.78361  | -1.2386  | 0.04162  |
| H | 0 | 9.95384  | -0.0891  | 0.00169  |
| H | 0 | 7.95932  | 3.72094  | -0.13263 |
| H | 0 | 5.76376  | 2.57345  | -0.09284 |
| H | 0 | 10.2608  | 3.40271  | -0.12058 |

## H-pip1-bz2-aI

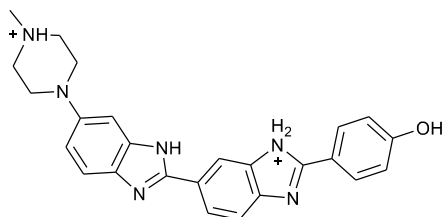

C,0,10.112918967,-1.9543350444,-0.1838210404  
N,0,8.6845237115,-1.6697566857,0.1913176111  
C,0,8.502237214,-0.271980903,0.7574139568  
C,0,7.0390627003,-0.0423546764,1.1218341915  
N,0,6.1877728831,-0.2523816764,-0.0448715165  
C,0,6.2881803651,-1.6139521368,-0.5339151683  
C,0,7.7260282513,-1.9061645202,-0.9620753029  
C,0,4.897898678,0.3710073924,-0.0146085001  
C,0,3.7127601294,-0.3702411194,-0.0481982987  
C,0,2.5165696437,0.3557479624,-0.0545647887  
C,0,2.4786284535,1.7695898558,-0.0041495321  
C,0,3.678207208,2.4953603964,0.0392254498  
C,0,4.8680456204,1.7894019408,0.0208377159  
N,0,1.1782789987,2.2181506977,-0.01813547  
C,0,0.4283341865,1.1374306938,-0.0709344019  
N,0,1.1881081699,-0.025326232,-0.0872562078  
C,0,-1.0357942676,1.1852485102,-0.1028046388  
C,0,-1.8462417381,0.0348446135,0.018510604  
C,0,-3.2108931985,0.2358427499,-0.0232393575  
C,0,-3.8212809328,1.4859028288,-0.1722590088  
C,0,-3.0223945756,2.6222635031,-0.2875730061  
C,0,-1.6420703654,2.4535288343,-0.2507237037  
N,0,-4.3072396478,-0.7471257331,0.0845389402  
C,0,-5.5867047561,0.1855541147,-0.0377437528  
N,0,-5.2160987325,1.3985834019,-0.1766830063  
C,0,-6.8854051526,-0.4188944635,0.021099342  
C,0,-8.0165165082,0.429909211,-0.0915904549  
C,0,-9.2918454857,-0.0894119104,-0.041871016  
C,0,-9.4825048472,-1.476323902,0.1225530285  
C,0,-8.3698449685,-2.3313045179,0.2358163076  
C,0,-7.0901522945,-1.8047958365,0.185135769  
O,0,-10.7502226043,-1.9100028791,0.162279433  
H,0,10.7438233791,-1.8103540174,0.6947887906  
H,0,10.1875218986,-2.9841091848,-0.536937017  
H,0,10.4075212611,-1.2634109582,-0.9749461579  
H,0,8.4244586197,-2.3281699196,0.9365463014  
H,0,8.8301967219,0.4201224131,-0.0217522554  
H,0,9.158813547,-0.1860230385,1.6269079759  
H,0,6.9387577244,0.9845311464,1.4782227532  
H,0,6.75530449,-0.7019782706,1.9655992947  
H,0,5.653428078,-1.7348316316,-1.4160065604  
H,0,5.965906557,-2.3702371286,0.2098831188  
H,0,8.0397646641,-1.2350038799,-1.7648156104  
H,0,7.8529277962,-2.9441376636,-1.2802567465  
H,0,3.7137658364,-1.4552613564,-0.0551743539

H, 0, 3.6644454947, 3.5798514566, 0.0598612325  
H, 0, 5.8089397172, 2.330710434, -0.0020894869  
H, 0, 0.8508839912, -0.97015901, -0.1954660202  
H, 0, -1.4208976666, -0.9546904596, 0.1564445615  
H, 0, -3.4707248871, 3.6028624586, -0.4021106745  
H, 0, -0.9858949175, 3.3123710251, -0.334364952  
H, 0, -4.3144659597, -1.2498901496, 0.980382788  
H, 0, -4.3009968601, -1.4476872332, -0.6666216621  
H, 0, -7.8644916264, 1.49631986, -0.2176774143  
H, 0, -10.1638652756, 0.5498479473, -0.1269049034  
H, 0, -8.5143862258, -3.4007538403, 0.3627908447  
H, 0, -6.2545049367, -2.4954501707, 0.2764469342  
H, 0, -10.7939765263, -2.8741832982, 0.2780050424

## H-pip1-bz2-aII

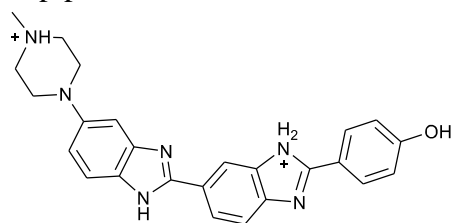

C,0,10.4861589279,-0.7154266272,-0.2045160449  
N,0,9.02518459,-0.6966979658,0.149919268  
C,0,8.5816831067,0.6428652038,0.7110962853  
C,0,7.0969055711,0.6002415346,1.059101952  
N,0,6.3109422166,0.2376367997,-0.116912553  
C,0,6.6718492289,-1.0843999006,-0.5991489341  
C,0,8.1406528794,-1.1017577243,-1.016068442  
C,0,4.9107113657,0.5559784472,-0.0509026671  
C,0,3.9257608361,-0.4272691645,-0.0037734846  
C,0,2.5834982376,-0.0159395543,0.0203984309  
C,0,2.2569560767,1.3602563182,0.0198072465  
C,0,3.238007768,2.3543371782,-0.0180842763  
C,0,4.5585371639,1.9307897817,-0.0652587165  
N,0,0.8756585592,1.391514724,0.0524783536  
C,0,0.438818259,0.0786963047,0.0842864775  
N,0,1.4394364567,-0.781179476,0.0628480672  
C,0,-0.9686335433,-0.3273062261,0.1298428571  
C,0,-2.031104802,0.5892849701,-0.0323182239  
C,0,-3.3073087434,0.0698349386,0.0283376353  
C,0,-3.6012324456,-1.2828110522,0.2325069409  
C,0,-2.5533687606,-2.1888184622,0.3871962001  
C,0,-1.2529175653,-1.6959761869,0.3329576553  
N,0,-4.6060695059,0.7574306531,-0.1101350179  
C,0,-5.6255052181,-0.4472147558,0.0597402864  
N,0,-4.9765763074,-1.5308703622,0.2442976913  
C,0,-7.0303029602,-0.1720026067,-0.0124680423  
C,0,-7.9278587962,-1.2597393776,0.1426691133  
C,0,-9.2898360674,-1.0601137606,0.0831244829  
C,0,-9.8039668793,0.2344627446,-0.1338198241  
C,0,-8.9258207384,1.323850783,-0.2896975961  
C,0,-7.5580171591,1.1183158171,-0.2290525453  
O,0,-11.1380502421,0.3531042827,-0.1798960749  
H,0,10.7520643798,-1.7139663504,-0.5550928671  
H,0,10.6608288378,0.0181860713,-0.9927792306  
H,0,11.0682745092,-0.4599158574,0.6823913897  
H,0,8.8783293289,-1.3931673542,0.8915100986  
H,0,8.785418855,1.383102242,-0.0662420848  
H,0,9.2011686433,0.8489993808,1.5875853118  
H,0,6.8069194961,1.5933720509,1.4091410206  
H,0,6.929466195,-0.0976660954,1.9032166151  
H,0,6.0735906739,-1.3284498787,-1.4812700775  
H,0,6.4947876095,-1.8843323926,0.1470814974  
H,0,8.3332848852,-0.3801758259,-1.8132775863  
H,0,8.4610475492,-2.096839579,-1.3350090908  
H,0,4.1546741568,-1.4868933044,0.0195763385

H, 0, 2.9939434284, 3.411873526, -0.0353696744  
H, 0, 5.3489250317, 2.6709395346, -0.145594947  
H, 0, 0.3121193612, 2.2255882185, 0.124218629  
H, 0, -1.8553483197, 1.6450957501, -0.2144012816  
H, 0, -2.754357123, -3.2426160788, 0.5446475  
H, 0, -0.4102906849, -2.3685243272, 0.4462685117  
H, 0, -4.7307986798, 1.2074156094, -1.0253386521  
H, 0, -4.7677754638, 1.4699298815, 0.6120534344  
H, 0, -7.5272683455, -2.2537272813, 0.3092542095  
H, 0, -9.9855041063, -1.883889156, 0.2002997212  
H, 0, -9.3197548534, 2.3225846676, -0.4571717523  
H, 0, -6.910292689, 1.9833763104, -0.3541944081  
H, 0, -11.4095441849, 1.2740229599, -0.3324591253

## H-pip1-bz2-bl

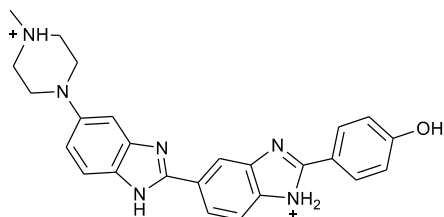

C,0,10.0444907497,2.1914633017,0.1421623594  
N,0,8.6358408939,1.8174632603,-0.2284410708  
C,0,8.5237115137,0.3779727105,-0.700009351  
C,0,7.0778201427,0.0588195748,-1.0658860727  
N,0,6.1999534845,0.3083438259,0.0733205549  
C,0,6.2346252369,1.7032211693,0.4703190784  
C,0,7.6513839369,2.0866924393,0.8955251235  
C,0,4.933903776,-0.3635218128,0.0583255296  
C,0,3.7239718299,0.334566732,0.0207194383  
C,0,2.553883653,-0.4324378611,0.0491859284  
C,0,2.5650845908,-1.8475494269,0.0859383125  
C,0,3.7904559698,-2.5303074925,0.1166360736  
C,0,4.9542434658,-1.7818691331,0.1143835537  
N,0,1.2796856326,-2.3388448104,0.0947801859  
C,0,0.4957041157,-1.281262349,0.0625012663  
N,0,1.2152924811,-0.0963439261,0.0336239762  
C,0,-0.9688349857,-1.3638702525,0.0587599514  
C,0,-1.7913276444,-0.2221764827,0.0131688999  
C,0,-3.1687727614,-0.4044865794,0.0150528591  
C,0,-3.7009126966,-1.6958477442,0.0610460092  
C,0,-2.9280403051,-2.8406923819,0.1059673977  
C,0,-1.5440958707,-2.6525129567,0.1041368531  
N,0,-4.1686647903,0.577828367,-0.0248607261  
C,0,-5.3225909169,0.0298010929,-0.00826447  
N,0,-5.1671613173,-1.540299293,0.0505160061  
C,0,-6.6446205689,0.5866050108,-0.0329718388  
C,0,-6.7729350732,1.9978480277,-0.0855430003  
C,0,-8.0169563877,2.589963686,-0.1110072538  
C,0,-9.1784928581,1.7915430262,-0.0847882597  
C,0,-9.0674743889,0.3893580893,-0.0326567311  
C,0,-7.815104653,-0.200517378,-0.0072651204  
O,0,-10.3534372182,2.4359374795,-0.1119254194  
H,0,10.6936181537,2.0174779374,-0.7175420395  
H,0,10.0679235759,3.2450476368,0.4251878834  
H,0,10.358457425,1.5697183638,0.9817461558  
H,0,8.3568353814,2.4117424468,-1.0193503498  
H,0,8.8698437551,-0.2443624057,0.1285842591  
H,0,9.1965092157,0.2628265157,-1.5535816439  
H,0,7.0283345016,-0.9933169434,-1.3526140248  
H,0,6.7782980395,0.6465132042,-1.9560799015  
H,0,5.5813468321,1.8551919421,1.3338855713  
H,0,5.8916849471,2.3928642024,-0.326968988  
H,0,7.9825355342,1.4847479209,1.7448230518  
H,0,7.7277992756,3.1480773572,1.1451443782  
H,0,3.6853418891,1.4170257407,-0.0410031391



H,0,3.8158863434,-3.6137167055,0.1655006818  
H,0,5.9128136598,-2.2858985507,0.1917028806  
H,0,0.8406651628,0.8405099338,0.0097172298  
H,0,-1.3958500262,0.7867986352,-0.0238732142  
H,0,-3.3512299831,-3.8397362533,0.1414234382  
H,0,-0.8779692508,-3.5065994828,0.1383099576  
H,0,-5.6193772413,-1.919331322,0.8923686833  
H,0,-5.6140695677,-1.9808595798,-0.7637628225  
H,0,-5.8763620566,2.6076870759,-0.1054859915  
H,0,-8.1275240664,3.6681242944,-0.1511683625  
H,0,-9.9608565929,-0.2288068177,-0.012339896  
H,0,-7.769025856,-1.2865278076,0.0330360519  
H,0,-11.1011960878,1.8149717484,-0.0910208922

## H-pip1-bz2-bII

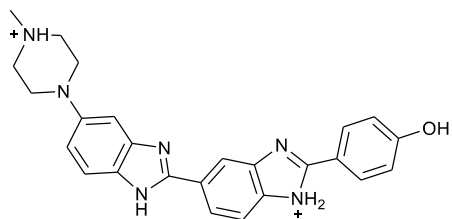

C,0,10.574355,0.489136,0.096403  
N,0,9.108525,0.505638,-0.23714  
C,0,8.60346,-0.850425,-0.697912  
C,0,7.116306,-0.771005,-1.028661  
N,0,6.364938,-0.29647,0.129672  
C,0,6.784342,1.039903,0.513494  
C,0,8.259289,1.026841,0.908819  
C,0,4.953159,-0.566809,0.109395  
C,0,4.002281,0.445513,0.011344  
C,0,2.645958,0.081376,0.039846  
C,0,2.273761,-1.28021,0.136912  
C,0,3.221036,-2.303805,0.227478  
C,0,4.554989,-1.924533,0.224823  
N,0,0.893883,-1.267404,0.125145  
C,0,0.499331,0.052894,0.024118  
N,0,1.526275,0.880409,-0.029654  
C,0,-0.900311,0.492026,-0.017845  
C,0,-1.97379,-0.416838,0.043349  
C,0,-3.266676,0.089004,-0.001039  
C,0,-3.472767,1.467544,-0.104184  
C,0,-2.446617,2.39109,-0.167077  
C,0,-1.147908,1.877454,-0.121879  
N,0,-4.472283,-0.624318,0.04574  
C,0,-5.461667,0.180996,-0.018507  
N,0,-4.933668,1.667088,-0.125939  
C,0,-6.878154,-0.043849,-0.008429  
C,0,-7.339281,-1.381622,0.087759  
C,0,-8.688615,-1.660289,0.102514  
C,0,-9.626189,-0.61059,0.021597  
C,0,-9.183956,0.722418,-0.074384  
C,0,-7.827081,0.997064,-0.088822  
O,0,-10.920796,-0.956243,0.041559  
H,0,10.885353,1.497738,0.373342  
H,0,10.731908,-0.194955,0.931416  
H,0,11.131946,0.149443,-0.777927  
H,0,8.977857,1.154326,-1.023707  
H,0,8.789528,-1.542889,0.126447  
H,0,9.200647,-1.141584,-1.56573  
H,0,6.781031,-1.773,-1.305158  
H,0,6.96358,-0.126526,-1.917003  
H,0,6.210273,1.367915,1.384399  
H,0,6.626738,1.792951,-0.284256  
H,0,8.435577,0.355467,1.752326  
H,0,8.624227,2.027848,1.152586  
H,0,4.267981,1.4921,-0.088554

H,0,2.940423,-3.348135,0.320895  
H,0,5.321465,-2.684448,0.3434  
H,0,0.297727,-2.079602,0.187963  
H,0,-1.833767,-1.48899,0.123361  
H,0,-2.617325,3.46016,-0.247005  
H,0,-0.295893,2.545563,-0.166279  
H,0,-5.268363,2.109718,-0.991258  
H,0,-5.276072,2.232049,0.661653  
H,0,-6.61408,-2.185608,0.149842  
H,0,-9.053031,-2.679165,0.175752  
H,0,-9.904323,1.533487,-0.136861  
H,0,-7.523105,2.038799,-0.163879  
H,0,-11.499157,-0.17703,-0.017674

## H-pip2-bz2-aI

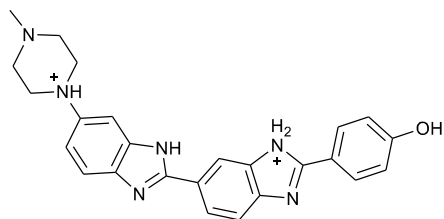

C, 0, -9.4990613162, -2.8045178426, 0.1070801409  
N, 0, -8.2091620944, -2.1085730312, 0.0802609689  
C, 0, -7.9719080098, -1.4190536534, -1.1783223219  
C, 0, -6.5366975829, -0.9077070016, -1.2408463037  
N, 0, -6.2698599328, 0.0220556219, -0.060862136  
C, 0, -6.6100135906, -0.6758003948, 1.2527815012  
C, 0, -8.0418133965, -1.1978297608, 1.2020373949  
C, 0, -4.9271738893, 0.6570033251, -0.0800988506  
C, 0, -3.7877065775, -0.138997052, 0.0262575007  
C, 0, -2.5736183255, 0.547385566, 0.0005999419  
C, 0, -2.4962291081, 1.9608138286, -0.1223004319  
C, 0, -3.6645907681, 2.7232241244, -0.2306459958  
C, 0, -4.88319679, 2.0560480367, -0.207506036  
N, 0, -1.1841289733, 2.3702180434, -0.1125095726  
C, 0, -0.4677664423, 1.2727092932, 0.0092597024  
N, 0, -1.2586139698, 0.1333223856, 0.0739701967  
C, 0, 0.9990553458, 1.277548952, 0.0651838871  
C, 0, 1.7739946614, 0.1026480123, -0.0463289832  
C, 0, 3.1433274108, 0.2618202747, 0.0128607209  
C, 0, 3.7875936068, 1.4953144123, 0.1705464026  
C, 0, 3.0221959558, 2.6551150333, 0.2758173492  
C, 0, 1.6373358186, 2.5276630905, 0.2201828407  
N, 0, 4.211719171, -0.7512622438, -0.0849323005  
C, 0, 5.5175449667, 0.1472020393, 0.0546561566  
N, 0, 5.177504097, 1.3706033571, 0.1916547317  
C, 0, 6.7969509727, -0.4915177009, 0.0100394535  
C, 0, 7.9497577347, 0.3276164491, 0.1379831651  
C, 0, 9.2104778091, -0.2252615203, 0.1023215716  
C, 0, 9.365568354, -1.6173946927, -0.0628099279  
C, 0, 8.2310644858, -2.4433324914, -0.1911592231  
C, 0, 6.9664577572, -1.8834486613, -0.1545969013  
O, 0, 10.6196556436, -2.0833415447, -0.0883200768  
H, 0, -9.5907044993, -3.3589088703, 1.0450848824  
H, 0, -9.5390255522, -3.5225864519, -0.7165644351  
H, 0, -10.359276393, -2.1197202946, 0.0182208059  
H, 0, -8.1114298419, -2.1170459513, -2.0101831128  
H, 0, -8.6757117398, -0.5767525858, -1.3470784178  
H, 0, -6.3345241792, -0.3329303532, -2.1471566378  
H, 0, -5.8236037288, -1.7289662534, -1.1572946767  
H, 0, -6.9478536054, 0.7886646744, -0.1521002261  
H, 0, -6.4580779175, 0.0573338338, 2.0478067552  
H, 0, -5.8974694859, -1.494270388, 1.3638454393  
H, 0, -8.2331902204, -1.7314789749, 2.1386465082  
H, 0, -8.7497809879, -0.3427838417, 1.171538623  
H, 0, -3.8387568249, -1.2185868452, 0.1224989664

H, 0, -3.6139318516, 3.802051105, -0.327537245  
H, 0, -5.8058904203, 2.626232848, -0.2882019918  
H, 0, -0.9474533606, -0.8112022672, 0.2485622793  
H, 0, 1.3207493591, -0.872930539, -0.1952168117  
H, 0, 3.4983784882, 3.6217473342, 0.396045038  
H, 0, 1.0081300503, 3.4074072122, 0.2938341357  
H, 0, 4.2157866025, -1.2517618219, -0.9823342611  
H, 0, 4.1781561308, -1.4533910848, 0.66429873  
H, 0, 7.8248966939, 1.3974979141, 0.2643824547  
H, 0, 10.098570577, 0.3897596344, 0.1988673398  
H, 0, 8.3491181739, -3.5158805436, -0.3186518788  
H, 0, 6.11391182, -2.5514178535, -0.2573230847  
H, 0, 10.6431196889, -3.0483538897, -0.2055437435

## H-pip2-bz2-aII

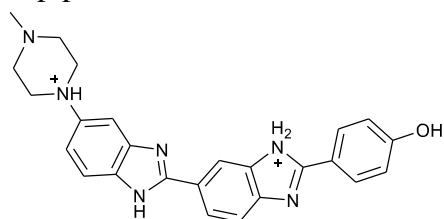

C,0,10.5639963008,0.2990481853,0.1283283906  
N,0,9.1443097425,-0.0588087072,0.0651573175  
C,0,8.4263487385,0.2767108525,1.2842359517  
C,0,7.0237408062,-0.3208293642,1.2558182756  
N,0,6.2708918116,0.1907406292,0.0307093116  
C,0,7.0745056814,-0.0818660545,-1.2379155327  
C,0,8.4746359979,0.5050746514,-1.0957987997  
C,0,4.8579877144,-0.2635136422,-0.0418399202  
C,0,3.8645428872,0.7029670142,0.0290733216  
C,0,2.5384654949,0.2578443535,-0.042721298  
C,0,2.2617416792,-1.1266871796,-0.1773729095  
C,0,3.2704230981,-2.0889503318,-0.248184943  
C,0,4.5848731122,-1.6381367132,-0.1786914154  
N,0,0.8848256623,-1.1988224823,-0.2097426727  
C,0,0.4017796202,0.0961260156,-0.1070711328  
N,0,1.372146667,0.9831092919,-0.0028345682  
C,0,-1.0207936223,0.4564961699,-0.1100747008  
C,0,-2.0504946273,-0.506134476,-0.0257568031  
C,0,-3.3434858903,-0.0259404062,-0.0338912587  
C,0,-3.6806209332,1.3308310275,-0.1156732711  
C,0,-2.6639402021,2.280901955,-0.1938809563  
C,0,-1.3477737307,1.8276861439,-0.1891719252  
N,0,-4.6187565364,-0.7632730725,0.0487012802  
C,0,-5.6773395234,0.4224539931,-0.0090257121  
N,0,-5.0607306429,1.5376416454,-0.0993953301  
C,0,-7.0701099294,0.1002599716,0.0443496026  
C,0,-7.9999247246,1.1720843441,-0.0102821268  
C,0,-9.3544490225,0.9285738912,0.0370956387  
C,0,-9.8297874672,-0.3953567081,0.1409433313  
C,0,-8.9193798626,-1.4695501784,0.1962581797  
C,0,-7.5594870478,-1.2201005986,0.1482882854  
O,0,-11.1575685621,-0.5554062222,0.1818491257  
H,0,11.0628046436,-0.0409057293,-0.7833636254  
H,0,11.027139201,-0.2102341261,0.977855963  
H,0,10.7298105335,1.3844484997,0.2360454868  
H,0,8.9496668564,-0.1493555131,2.1463316271  
H,0,8.362305307,1.3719197458,1.458459605  
H,0,6.4306565399,-0.041632352,2.1292864772  
H,0,7.0615913251,-1.4072745965,1.1675240029  
H,0,6.2402293481,1.2130473355,0.1280891453  
H,0,6.5159174957,0.3601156329,-2.0657277529  
H,0,7.1132419544,-1.1654596784,-1.3558654917  
H,0,9.0339418761,0.2488424504,-2.0013982466  
H,0,8.4131351767,1.613651968,-1.0609621371  
H,0,4.0791034517,1.7633828935,0.1340182676

H, 0, 3.0583547548, -3.1478404592, -0.3528589464  
H, 0, 5.3915451288, -2.3615006038, -0.2307919685  
H, 0, 0.347488365, -2.0399889234, -0.3625796127  
H, 0, -1.8402457514, -1.5678825639, 0.0610042232  
H, 0, -2.899816321, 3.3373372463, -0.2561195527  
H, 0, -0.5299025107, 2.5369378482, -0.2461051174  
H, 0, -4.7241463457, -1.2960359392, 0.9210640653  
H, 0, -4.7649411319, -1.4132169023, -0.7335337138  
H, 0, -7.6291153935, 2.1881329643, -0.0899884067  
H, 0, -10.074565919, 1.7385329443, -0.0038161465  
H, 0, -9.2840716823, -2.4899006112, 0.2763913148  
H, 0, -6.8864649917, -2.0736210175, 0.1937208876  
H, 0, -11.4054346, -1.4929745115, 0.2534369169

# H-pip2-bz2-bl

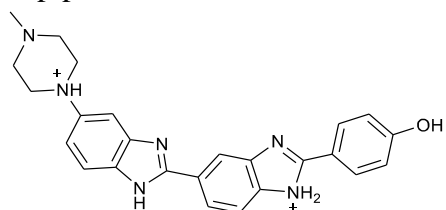

|   |   |           |          |          |
|---|---|-----------|----------|----------|
| C | 0 | 10.64413  | 0.07755  | 0.00061  |
| N | 0 | 9.21156   | -0.23043 | 0.00033  |
| C | 0 | 8.53492   | 0.24489  | 1.19628  |
| C | 0 | 7.11181   | -0.29982 | 1.25284  |
| N | 0 | 6.34874   | 0.12207  | 0.00031  |
| C | 0 | 7.112     | -0.29841 | -1.25259 |
| C | 0 | 8.53511   | 0.24621  | -1.1952  |
| C | 0 | 4.91966   | -0.28478 | -0.00005 |
| C | 0 | 3.96156   | 0.71911  | 0.00027  |
| C | 0 | 2.61973   | 0.31666  | -0.00008 |
| C | 0 | 2.29421   | -1.06415 | -0.00072 |
| C | 0 | 3.26834   | -2.06465 | -0.00105 |
| C | 0 | 4.59754   | -1.6561  | -0.00071 |
| N | 0 | 0.91735   | -1.09179 | -0.00088 |
| C | 0 | 0.47929   | 0.22049  | -0.00037 |
| N | 0 | 1.47773   | 1.08199  | 0.00011  |
| C | 0 | -0.93694  | 0.61598  | -0.00036 |
| C | 0 | -1.97704  | -0.33145 | -0.0001  |
| C | 0 | -3.28722  | 0.1325   | -0.00009 |
| C | 0 | -3.53652  | 1.50824  | -0.00031 |
| C | 0 | -2.54284  | 2.46777  | -0.00053 |
| C | 0 | -1.22667  | 1.99588  | -0.00056 |
| N | 0 | -4.46646  | -0.62163 | 0.00018  |
| C | 0 | -5.48359  | 0.15337  | 0.00012  |
| N | 0 | -5.00298  | 1.66146  | -0.00017 |
| C | 0 | -6.8898   | -0.11642 | 0.00017  |
| C | 0 | -7.30724  | -1.47294 | -0.00022 |
| C | 0 | -8.64624  | -1.79542 | -0.00013 |
| C | 0 | -9.61782  | -0.77292 | 0.00039  |
| C | 0 | -9.2193   | 0.57825  | 0.00077  |
| C | 0 | -7.87287  | 0.897    | 0.00066  |
| O | 0 | -10.89859 | -1.16121 | 0.00051  |
| H | 0 | 11.10882  | -0.36555 | -0.88441 |
| H | 0 | 11.10868  | -0.36654 | 0.88522  |
| H | 0 | 10.85142  | 1.16121  | 0.00123  |
| H | 0 | 9.06304   | -0.1174  | 2.08416  |
| H | 0 | 8.51365   | 1.35333  | 1.26696  |
| H | 0 | 6.5497    | 0.08184  | 2.1078   |
| H | 0 | 7.1094    | -1.39036 | 1.26721  |
| H | 0 | 6.35612   | 1.14938  | 0.0009   |
| H | 0 | 6.55003   | 0.08423  | -2.1072  |
| H | 0 | 7.10955   | -1.38894 | -1.26819 |
| H | 0 | 9.06336   | -0.11513 | -2.0834  |
| H | 0 | 8.51388   | 1.35472  | -1.26468 |
| H | 0 | 4.21499   | 1.77614  | 0.00077  |



|   |   |          |          |          |
|---|---|----------|----------|----------|
| H | 0 | 3.01756  | -3.12017 | -0.00155 |
| H | 0 | 5.37836  | -2.40912 | -0.00095 |
| H | 0 | 0.34571  | -1.9246  | -0.00149 |
| H | 0 | -1.80247 | -1.40161 | 0.00017  |
| H | 0 | -2.74899 | 3.53348  | -0.00069 |
| H | 0 | -0.39925 | 2.69552  | -0.00074 |
| H | 0 | -5.35686 | 2.15615  | -0.82908 |
| H | 0 | -5.35662 | 2.15642  | 0.82868  |
| H | 0 | -6.55651 | -2.25555 | -0.00062 |
| H | 0 | -8.97767 | -2.82806 | -0.00047 |
| H | 0 | -9.96588 | 1.36762  | 0.00116  |
| H | 0 | -7.60336 | 1.95084  | 0.001    |
| H | 0 | -11.5049 | -0.40093 | 0.00076  |

# H-pip2-bz2-bII

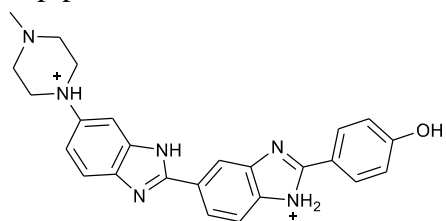

|   |   |           |          |          |
|---|---|-----------|----------|----------|
| C | 0 | 9.40847   | -3.00503 | 0.00105  |
| N | 0 | 8.1485    | -2.25618 | 0.00079  |
| C | 0 | 7.97918   | -1.44503 | 1.19609  |
| C | 0 | 6.56734   | -0.87173 | 1.2528   |
| N | 0 | 6.29751   | -0.04414 | -0.00045 |
| C | 0 | 6.56671   | -0.87366 | -1.25254 |
| C | 0 | 7.97859   | -1.44684 | -1.19566 |
| C | 0 | 4.98095   | 0.64356  | -0.00058 |
| C | 0 | 3.8111    | -0.11301 | -0.00014 |
| C | 0 | 2.62423   | 0.62061  | -0.00022 |
| C | 0 | 2.60197   | 2.0415   | -0.00069 |
| C | 0 | 3.80072   | 2.7638   | -0.00112 |
| C | 0 | 4.99254   | 2.04959  | -0.00105 |
| N | 0 | 1.30462   | 2.49752  | -0.00065 |
| C | 0 | 0.54905   | 1.41966  | -0.00018 |
| N | 0 | 1.29601   | 0.25241  | 0.00009  |
| C | 0 | -0.92095  | 1.46261  | 0.00005  |
| C | 0 | -1.70773  | 0.29647  | -0.00022 |
| C | 0 | -3.09068  | 0.43861  | 0.       |
| C | 0 | -3.65672  | 1.717    | 0.00047  |
| C | 0 | -2.91786  | 2.884    | 0.00073  |
| C | 0 | -1.52781  | 2.73561  | 0.00051  |
| N | 0 | -4.06004  | -0.57163 | -0.00019 |
| C | 0 | -5.23076  | -0.05668 | 0.00012  |
| N | 0 | -5.11801  | 1.5209   | 0.00059  |
| C | 0 | -6.53468  | -0.6488  | 0.00006  |
| C | 0 | -6.62338  | -2.0652  | -0.00062 |
| C | 0 | -7.84985  | -2.69193 | -0.00069 |
| C | 0 | -9.03369  | -1.9251  | -0.00008 |
| C | 0 | -8.96219  | -0.51829 | 0.00059  |
| C | 0 | -7.7276   | 0.10648  | 0.00066  |
| O | 0 | -10.18811 | -2.6023  | -0.00019 |
| H | 0 | 9.44722   | -3.64674 | -0.88341 |
| H | 0 | 9.44764   | -3.64542 | 0.88646  |
| H | 0 | 10.29734  | -2.35171 | 0.00036  |
| H | 0 | 8.11909   | -2.0689  | 2.08478  |
| H | 0 | 8.71973   | -0.62025 | 1.26524  |
| H | 0 | 6.41728   | -0.20839 | 2.10723  |
| H | 0 | 5.82111   | -1.66719 | 1.2672   |
| H | 0 | 7.00689   | 0.69911  | -0.00123 |
| H | 0 | 6.41619   | -0.21167 | -2.10793 |
| H | 0 | 5.82052   | -1.66919 | -1.26534 |
| H | 0 | 8.11809   | -2.07205 | -2.08347 |
| H | 0 | 8.71909   | -0.62215 | -1.2664  |
| H | 0 | 3.81804   | -1.19801 | 0.00024  |

|   |   |           |          |          |
|---|---|-----------|----------|----------|
| H | 0 | 3.79376   | 3.84812  | -0.0015  |
| H | 0 | 5.93776   | 2.58761  | -0.00139 |
| H | 0 | 0.94271   | -0.69364 | 0.00062  |
| H | 0 | -1.28505  | -0.70218 | -0.00067 |
| H | 0 | -3.36927  | 3.87115  | 0.00108  |
| H | 0 | -0.88806  | 3.61021  | 0.00067  |
| H | 0 | -5.57802  | 1.91943  | -0.82808 |
| H | 0 | -5.57781  | 1.91895  | 0.82961  |
| H | 0 | -5.71042  | -2.65048 | -0.00108 |
| H | 0 | -7.93067  | -3.77344 | -0.00121 |
| H | 0 | -9.8726   | 0.07469  | 0.00106  |
| H | 0 | -7.71221  | 1.19409  | 0.00119  |
| H | 0 | -10.95543 | -2.00489 | 0.00025  |

## Excited State (S<sub>1</sub>) of 1+ Charge State at B3LYP/6-31G(d)

### H-pipN2-I (S<sub>1</sub>)

C, 0, 6.9398488698, 3.3674564141, 1.7820370788  
N, 0, 7.1139419941, 2.4131948649, 0.6410808373  
C, 0, 7.2342567453, 0.9691734578, 1.1066173244  
C, 0, 7.4433659906, 0.0605796431, -0.1127521447  
N, 0, 6.3543789919, 0.1730603986, -1.0686500538  
C, 0, 6.2320389794, 1.5375349414, -1.5339109098  
C, 0, 6.0125872342, 2.5572077755, -0.3992073869  
C, 0, 5.1434571966, -0.558156957, -0.7425887137  
C, 0, 3.8903905358, 0.0803243587, -0.6815433239  
C, 0, 2.7491864655, -0.7171122803, -0.3943729314  
C, 0, 2.912596314, -2.1077805038, -0.1325419955  
C, 0, 4.1538744771, -2.7399461847, -0.1818872145  
C, 0, 5.2708620308, -1.9369353933, -0.5109245288  
N, 0, 1.639159763, -2.5592686555, 0.1363654821  
C, 0, 0.7617762091, -1.4706661265, -0.0035719777  
N, 0, 1.4424186237, -0.353017596, -0.3097095669  
C, 0, -0.6695200698, -1.5435606598, 0.1670027878  
C, 0, -1.4656974247, -0.4210555807, -0.0896204595  
C, 0, -2.8647386357, -0.5351714591, 0.0729323647  
C, 0, -3.4628225636, -1.7637887531, 0.4903585935  
C, 0, -2.6870353719, -2.8938767146, 0.7629743297  
C, 0, -1.3178730612, -2.7598521061, 0.6006776824  
N, 0, -3.8269977526, 0.4066615702, -0.1251920923  
C, 0, -4.9990009424, -0.1966195185, 0.1534367652  
N, 0, -4.8204458556, -1.5082458043, 0.5312970639  
C, 0, -6.2607071667, 0.4795505029, 0.0529757747  
C, 0, -6.266561541, 1.8435557949, -0.3618924848  
C, 0, -7.4451028633, 2.541576443, -0.4790842377  
C, 0, -8.6693787225, 1.9006780801, -0.1848658607  
C, 0, -8.686828956, 0.5478339599, 0.2292462608  
C, 0, -7.501293556, -0.1463166928, 0.3447401563  
O, 0, -9.784845555, 2.6306896537, -0.3174435926  
H, 0, 6.9004369079, 4.3857699103, 1.390637242  
H, 0, 6.0056971232, 3.1261312594, 2.2912999772  
H, 0, 7.780758099, 3.2569310057, 2.4693730672  
H, 0, 7.9987511909, 2.6454026963, 0.1722556136  
H, 0, 6.2959185247, 0.7248531606, 1.6113518979  
H, 0, 8.0633653717, 0.9330225201, 1.8197413319  
H, 0, 7.5289382785, -0.9652994899, 0.2444370655  
H, 0, 8.3941522078, 0.316845104, -0.6063579632  
H, 0, 5.3994409253, 1.6178785304, -2.2361480332  
H, 0, 7.1470911373, 1.8092445232, -2.0832269323  
H, 0, 5.0770020729, 2.3658265646, 0.1297480051  
H, 0, 6.0413111114, 3.5934144616, -0.7502236508  
H, 0, 3.7364349694, 1.1277993994, -0.9089841835  
H, 0, 4.2704524574, -3.805335177, -0.0117559936  
H, 0, 6.2367968369, -2.4147519278, -0.6446870512  
H, 0, 1.3828307279, -3.5312329725, 0.2106547824  
H, 0, -1.0124773558, 0.5075962201, -0.4127154002  
H, 0, -3.1199354164, -3.833250548, 1.092195535  
H, 0, -0.7033578837, -3.6253960898, 0.8297820167

H, 0, -5.5374835305, -2.1714580148, 0.783699781  
H, 0, -5.3139371173, 2.3102081321, -0.5822744969  
H, 0, -7.464122613, 3.578950015, -0.7943667579  
H, 0, -9.6330021871, 0.0623539856, 0.4539796242  
H, 0, -7.5353778043, -1.1829317635, 0.663932652  
H, 0, -10.574445417, 2.107659622, -0.0959240552

## H-pipN2-II (S<sub>1</sub>)

C, 0, 8.1513150965, 2.3358580918, 1.8478713087  
N, 0, 8.0151362436, 1.234611796, 0.8396747881  
C, 0, 7.5412445032, -0.0686811064, 1.4650090361  
C, 0, 7.462777686, -1.1560797729, 0.3832842662  
N, 0, 6.5791397731, -0.7796881909, -0.7076892695  
C, 0, 7.012421416, 0.4585103362, -1.3192073315  
C, 0, 7.1219489104, 1.6311719375, -0.3266498602  
C, 0, 5.1676282078, -1.0109013998, -0.5163470534  
C, 0, 4.2232390931, 0.016024344, -0.6474893578  
C, 0, 2.8532183532, -0.3108659254, -0.4842581872  
C, 0, 2.4796713439, -1.6506892249, -0.16405731  
C, 0, 3.4186163048, -2.6741613341, -0.0284683502  
C, 0, 4.7670574238, -2.3337389775, -0.2256860642  
N, 0, 1.1109292111, -1.6078523602, -0.0579190837  
C, 0, 0.6994157579, -0.2934410599, -0.3146368725  
N, 0, 1.7645833202, 0.4931920015, -0.5673048095  
C, 0, -0.6658938929, 0.1415407958, -0.3050113006  
C, 0, -1.7463898673, -0.7343614419, -0.0194032898  
C, 0, -3.0257041021, -0.1882957968, -0.0488295943  
C, 0, -3.2843549477, 1.188869026, -0.3454044889  
C, 0, -2.1919232926, 2.054154678, -0.6271554141  
C, 0, -0.9257615199, 1.5310801382, -0.604226838  
N, 0, -4.2732062842, -0.7285978595, 0.169562168  
C, 0, -5.2110719003, 0.2898152486, 0.0054965161  
N, 0, -4.6135202136, 1.4497902897, -0.3050461461  
C, 0, -6.630147402, 0.127738465, 0.1470166725  
C, 0, -7.4717831997, 1.2595952318, -0.0501461326  
C, 0, -8.8394320804, 1.1583737716, 0.0729139715  
C, 0, -9.425048667, -0.0832066631, 0.3991904002  
C, 0, -8.6123273332, -1.2171390634, 0.5989614942  
C, 0, -7.2387045289, -1.1111459062, 0.4745515984  
O, 0, -10.7690329523, -0.1187511274, 0.5053344085  
H, 0, 8.5317433449, 3.2286270797, 1.3480271584  
H, 0, 7.1671967525, 2.5360637819, 2.2740532359  
H, 0, 8.8413362163, 2.0162347915, 2.6310232314  
H, 0, 8.9496104918, 1.0531734648, 0.4506503211  
H, 0, 6.5536354385, 0.1313858872, 1.8889317905  
H, 0, 8.2457972233, -0.3132689691, 2.2655958633  
H, 0, 7.1106336265, -2.0738095818, 0.8549752925  
H, 0, 8.4709098578, -1.3567237637, -0.0116191095  
H, 0, 6.3220693072, 0.7410344068, -2.1170409534  
H, 0, 7.9970621697, 0.2978705688, -1.7857849449  
H, 0, 6.1541401904, 1.882298734, 0.1115909861  
H, 0, 7.5662773394, 2.5226858181, -0.779568573  
H, 0, 4.477674038, 1.0378727486, -0.9016463016  
H, 0, 3.1328910761, -3.6986105719, 0.1880848687  
H, 0, 5.514597941, -3.1213593882, -0.2080056194  
H, 0, 0.5109835032, -2.3997082656, 0.1132519125  
H, 0, -1.5910758788, -1.782741275, 0.2147926708  
H, 0, -2.374133407, 3.0993213513, -0.8545583811  
H, 0, -0.0627868919, 2.151567213, -0.8156290988  
H, 0, -4.4653407004, -1.6912549839, 0.4005378624  
H, 0, -7.004089011, 2.2048410116, -0.3007249277

H, 0, -9.486837953, 2.0160808408, -0.0760352763  
H, 0, -9.0669331105, -2.1727651348, 0.8501754104  
H, 0, -6.6352757734, -2.0000280782, 0.6333008612  
H, 0, -11.0686862513, -1.0154166272, 0.730691846

## H-pipN5-I (S<sub>1</sub>)

C, 0, -9.9401349251, -2.2948345777, -0.0479799098  
N, 0, -8.7594244104, -1.4356865994, -0.0263803973  
C, 0, -7.9468247054, -1.6410243933, 1.1652220006  
C, 0, -6.8256193429, -0.6098707925, 1.2357144728  
N, 0, -5.96940554, -0.6807988221, -0.0099782212  
C, 0, -6.8292670491, -0.5424264593, -1.2474632202  
C, 0, -7.9503448434, -1.5759754259, -1.2297533988  
C, 0, -4.7857729357, 0.2291696609, 0.0130036066  
C, 0, -3.5322929746, -0.4054501613, -0.0060292085  
C, 0, -2.4033352922, 0.4702109496, 0.0161139083  
C, 0, -2.6087640255, 1.8718001277, 0.0544602724  
C, 0, -3.8780170863, 2.4818222204, 0.0728446991  
C, 0, -4.9922541901, 1.6033439632, 0.0506046612  
N, 0, -1.3388488542, 2.4002742755, 0.0669859006  
C, 0, -0.4322084576, 1.3423563782, 0.0369448436  
N, 0, -1.0705031432, 0.1744793495, 0.0061598575  
C, 0, 1.0258385484, 1.488950024, 0.0388138159  
C, 0, 1.818170477, 0.3473152229, 0.0063788244  
C, 0, 3.223931284, 0.5011222146, 0.0085285168  
C, 0, 3.8230131221, 1.7916271787, 0.0429909059  
C, 0, 3.0468673087, 2.9462106402, 0.0757630747  
C, 0, 1.6670333554, 2.7689631237, 0.072947002  
N, 0, 4.1848582095, -0.463876683, -0.0193192072  
C, 0, 5.3598467933, 0.1906603312, -0.0031201669  
N, 0, 5.1893250468, 1.5529155914, 0.0344477785  
C, 0, 6.6194730647, -0.5023834807, -0.0239543496  
C, 0, 6.6051959332, -1.9282402901, -0.0630131797  
C, 0, 7.776622541, -2.6444296285, -0.0843552998  
C, 0, 9.0143996885, -1.9586901067, -0.0673691557  
C, 0, 9.050943292, -0.5419320091, -0.0285898978  
C, 0, 7.8714401144, 0.1684254416, -0.0073966551  
O, 0, 10.1189743566, -2.7071525193, -0.0894980564  
H, 0, -10.5473349356, -2.0570491015, -0.926586102  
H, 0, -10.544732357, -2.1051393538, 0.8440178847  
H, 0, -9.6919555307, -3.3714832111, -0.0775867347  
H, 0, -8.5739984089, -1.5232154872, 2.0551422945  
H, 0, -7.5159924912, -2.6644129886, 1.2097063947  
H, 0, -6.1575377873, -0.7762084943, 2.0830011304  
H, 0, -7.2221237494, 0.4044480106, 1.284080185  
H, 0, -5.5754048383, -1.6278109199, -0.0362780635  
H, 0, -6.1636921632, -0.6624744965, -2.1044897942  
H, 0, -7.2258335175, 0.4729896034, -1.2395366753  
H, 0, -8.5801201972, -1.4100833923, -2.1101208407  
H, 0, -7.5197279522, -2.5954067493, -1.3309888571  
H, 0, -3.4107419199, -1.48337146, -0.0354787937  
H, 0, -4.0123819325, 3.5559645932, 0.1021922631  
H, 0, -5.9952918509, 2.0187970615, 0.0633325655  
H, 0, -1.1279755167, 3.3855644878, 0.0933342205  
H, 0, 1.3612989312, -0.6346249453, -0.0198438115  
H, 0, 3.4787330672, 3.9414735661, 0.1024035648  
H, 0, 1.054416367, 3.665137862, 0.0984434034  
H, 0, 5.9107677218, 2.2578647201, 0.0526579186  
H, 0, 5.6431668035, -2.4260312564, -0.0752506713



H, 0, 7.7835020654, -3.7281668817, -0.1140692109  
H, 0, 10.0067280688, -0.0251831886, -0.0158202406  
H, 0, 7.9170019803, 1.251848811, 0.022237695  
H, 0, 10.9229432514, -2.1587230142, -0.0756403066

## H-pipN5-II (S<sub>1</sub>)

C, 0, -10.3367614888, -0.9430727032, -0.2108190139  
N, 0, -8.8927964324, -0.7304653835, -0.1632421938  
C, 0, -8.4125090014, 0.0538352061, -1.2930217844  
C, 0, -6.8896709077, 0.1102720838, -1.3030921648  
N, 0, -6.3605790816, 0.6906192317, -0.0004125949  
C, 0, -6.9436906135, -0.0777764185, 1.1760506451  
C, 0, -8.464403484, -0.1271898883, 1.0916825389  
C, 0, -4.8921046337, 0.8342128782, 0.04249865  
C, 0, -4.0764533519, -0.3412388466, -0.0271456959  
C, 0, -2.6976620034, -0.0730191145, 0.0298518202  
C, 0, -2.1461438861, 1.22584295, 0.1426102592  
C, 0, -3.0083835229, 2.3674893572, 0.2096041371  
C, 0, -4.3762119929, 2.1309245594, 0.1569644176  
N, 0, -0.777780564, 1.1658234978, 0.1684262739  
C, 0, -0.4598012762, -0.1151043443, 0.0772915133  
N, 0, -1.6025122555, -0.9106234132, -0.0018438282  
C, 0, 0.919427246, -0.6260025159, 0.0694364829  
C, 0, 1.9672728699, 0.2830487002, 0.0235814524  
C, 0, 3.291213653, -0.214000781, 0.0221094951  
C, 0, 3.5510772542, -1.6132985597, 0.0602831779  
C, 0, 2.5137619648, -2.5383692264, 0.1075020153  
C, 0, 1.2202789918, -2.0226276268, 0.1157051336  
N, 0, 4.4601385834, 0.4824534991, -0.0157792974  
C, 0, 5.4362886649, -0.4423343285, -0.0019494104  
N, 0, 4.9334762247, -1.7203977645, 0.0427531634  
C, 0, 6.8276448903, -0.0824465905, -0.032043677  
C, 0, 7.1655391734, 1.3030254263, -0.0735279578  
C, 0, 8.4772170498, 1.7075857781, -0.1025803975  
C, 0, 9.507329736, 0.7370440297, -0.0913603897  
C, 0, 9.1931116197, -0.6451609938, -0.0507576116  
C, 0, 7.8750450514, -1.0420597724, -0.0218334219  
O, 0, 10.7617948753, 1.1893649535, -0.120716595  
H, 0, -10.6380984358, -1.5850176287, 0.6224730477  
H, 0, -10.5996323454, -1.4511710492, -1.1435658485  
H, 0, -10.9152070271, -0.0030062985, -0.1521691374  
H, 0, -8.7424973911, -0.4161934398, -2.2257204054  
H, 0, -8.8246555316, 1.085941983, -1.2921926727  
H, 0, -6.500940668, 0.7455357701, -2.1011625252  
H, 0, -6.4538415005, -0.8850734825, -1.3935786278  
H, 0, -6.7354754563, 1.6434151377, 0.0636792652  
H, 0, -6.5920020867, 0.4288811208, 2.0767109605  
H, 0, -6.5084011619, -1.0765990742, 1.1343305939  
H, 0, -8.8328675737, -0.7315545072, 1.9275874072  
H, 0, -8.8796474177, 0.8945141139, 1.2288080142  
H, 0, -4.478888484, -1.3428099686, -0.1156942547  
H, 0, -2.6041400212, 3.3677667004, 0.2954955755  
H, 0, -5.0644888817, 2.9761923251, 0.2053927307  
H, 0, -1.6418731641, -1.9084643261, -0.1379734338  
H, 0, 1.766661282, 1.3473915878, -0.0065385595  
H, 0, 2.6852852755, -3.6093030993, 0.1443224388  
H, 0, 0.4032515108, -2.735737408, 0.1715303758  
H, 0, 5.4582346899, -2.5817553898, 0.065876944  
H, 0, 6.3563760129, 2.0232049536, -0.0810002724

H, 0, 8.7514669695, 2.7559904603, -0.1339309937  
H, 0, 9.991807645, -1.3817935854, -0.0428043976  
H, 0, 7.6516146423, -2.1031448805, 0.0086213987  
H, 0, 11.4062267661, 0.4599791055, -0.110272765
